# Supplementary material for: Translation of 5′ leaders is pervasive in genes resistant to eIF2 repression
Source: eLife journal article supplement (doi:10.7554/elife.03971), 2015-01-23
Supplement: supp [file source-data-1.xlsx]

## Sheet: Sheet1
Gene name	RefSeq accession number	Riboseq control reads, coding	Riboseq arsenite reads, coding(normalised)	Riboseq fold change	Riboseq Z-score	RNAseq control, (normalised)	RNAseq arsenite, reads	RNAseq fold change	RNAseq Z-score	TE fold change	TE Z-score
A2ML1	NM_144670	0	0	na	na	5.7	4	0.7	-0.77	na	na
AANAT	NM_001088	4	0.5	na	na	15.3	8	0.52	-1.62	na	na
AATK	NM_001080395	17	1	na	na	117.8	125	1.06	-0.54	na	na
ABCA10	NM_080282	0	0	na	na	36.4	35	0.96	-0.68	na	na
ABCA13	NM_152701	0	0	na	na	12.5	12	0.96	-0.37	na	na
ABCA4	NM_000350	0	0	na	na	1.9	2	1.04	-0.07	na	na
ABCA6	NM_080284	0	0	na	na	2.9	3	1.04	-0.08	na	na
ABCA8	NM_007168	0	0.5	na	na	5.7	6	1.04	-0.07	na	na
ABCA9	NM_080283	0	0	na	na	4.8	3	0.63	-0.94	na	na
ABCB5	NM_178559	0	0	na	na	10.5	8	0.76	-0.84	na	na
ABCC11	NM_145186	1	0.5	na	na	12.5	20	1.61	1.17	na	na
ABCC2	NM_000392	1	0	na	na	49.8	49	0.98	-0.75	na	na
ABCC6	NM_001171	4	0.5	na	na	29.7	47	1.58	1.23	na	na
ABCC8	NM_000352	9	1	na	na	44.1	52	1.18	0.2	na	na
ABCG4	NM_001142505	5	0.5	na	na	69.9	75	1.07	-0.37	na	na
ABCG5	NM_022436	0	0	na	na	3.8	5	1.3	0.3	na	na
ABHD1	NM_032604	0	1.5	na	na	20.1	23	1.14	0.1	na	na
ABI3BP	NM_015429	2	1	na	na	9.6	17	1.77	1.12	na	na
ABLIM3	NM_014945	0	0.5	na	na	20.1	16	0.8	-0.95	na	na
ACAP1	NM_014716	0	1.5	na	na	8.6	4	0.46	-1.46	na	na
ACOT1	NM_001037161	2	0	na	na	1.9	2	1.04	-0.07	na	na
ACOT6	NM_001037162	0	0	na	na	2.9	2	0.7	-0.61	na	na
ACOX2	NM_003500	0	0	na	na	3.8	2	0.52	-0.99	na	na
ACOXL	NM_001142807	3	0	na	na	6.7	8	1.19	0.1	na	na
ACPP	NM_001134194	3	0.5	na	na	10.5	10	0.95	-0.38	na	na
ACR	NM_001097	0	0	na	na	7.7	6	0.78	-0.78	na	na
ACRC	NM_052957	3	0.5	na	na	32.6	47	1.44	0.88	na	na
ACSBG1	NM_001199377	0	0	na	na	6.7	9	1.34	0.34	na	na
ACTA1	NM_001100	2	0.5	na	na	14.4	19	1.32	0.58	na	na
ACTG2	NM_001615	1	0	na	na	12.5	16	1.28	0.5	na	na
ACTL6B	NM_016188	3	0	na	na	5.7	7	1.22	0.19	na	na
ACTL8	NM_030812	2	1	na	na	3.8	12	3.13	1.8	na	na
ACTR3C	NM_001164459	1	0	na	na	12.5	8	0.64	-1.19	na	na
ACVRL1	NM_001077401	5	0.5	na	na	9.6	13	1.36	0.48	na	na
ACY1	NM_001198898	0	0	na	na	32.6	38	1.17	0.07	na	na
ACYP2	NM_138448	10	1	na	na	54.6	56	1.03	-0.54	na	na
ADAM12	NM_021641	1	0	na	na	3.8	8	2.09	1.11	na	na
ADAM19	NM_033274	25	1	na	na	123.6	145	1.17	0.03	na	na
ADAM20	NM_003814	0	0	na	na	5.7	4	0.7	-0.77	na	na
ADAM21	NM_003813	0	0	na	na	1.9	2	1.04	-0.07	na	na
ADAM32	NM_145004	0	0	na	na	13.4	5	0.37	-1.84	na	na
ADAM8	NM_001109	0	0	na	na	44.1	44	1	-0.51	na	na
ADAMTS10	NM_030957	3	0	na	na	54.6	47	0.86	-1.42	na	na
ADAMTS14	NM_080722	1	0	na	na	6.7	10	1.49	0.56	na	na
ADAMTS18	NM_199355	0	0	na	na	1.9	4	2.09	0.84	na	na
ADAMTS5	NM_007038	1	0	na	na	7.7	12	1.57	0.66	na	na
ADAMTS6	NM_197941	2	1	na	na	84.3	90	1.07	-0.49	na	na
ADAMTS8	NM_007037	2	0	na	na	5.7	5	0.87	-0.39	na	na
ADAMTSL1	NM_052866	1	1	na	na	5.7	6	1.04	-0.07	na	na
ADAMTSL3	NM_207517	3	0.5	na	na	15.3	21	1.37	0.69	na	na
ADAMTSL4	NM_019032	0	0	na	na	17.2	22	1.28	0.48	na	na
ADCY10	NM_001167749	2	0	na	na	10.5	10	0.95	-0.38	na	na
ADCY2	NM_020546	0	0	na	na	11.5	7	0.61	-1.3	na	na
ADCY5	NM_183357	1	0.5	na	na	23.9	22	0.92	-0.66	na	na
ADHFE1	NM_144650	1	0	na	na	20.1	26	1.29	0.52	na	na
ADM5	NM_001101340	0	0	na	na	54.6	53	0.97	-0.82	na	na
ADPRH	NM_001125	7	1	na	na	23.9	9	0.38	-2.6	na	na
ADRA1A	NM_033303	0	0	na	na	2.9	3	1.04	-0.08	na	na
ADRA1B	NM_000679	1	0	na	na	12.5	9	0.72	-1.03	na	na
ADRA2A	NM_000681	0	0	na	na	1.9	3	1.57	0.46	na	na
ADRA2B	NM_000682	0	0	na	na	2.9	4	1.39	0.41	na	na
ADRB1	NM_000684	0	0.5	na	na	23	16	0.7	-1.35	na	na
ADSSL1	NM_152328	9	1	na	na	52.7	51	0.97	-0.83	na	na
AEBP1	NM_001129	0	0	na	na	1.9	3	1.57	0.46	na	na
AFF2	NM_001170628	0	0	na	na	6.7	14	2.09	1.26	na	na
AGAP11	NM_133447	1	0	na	na	21.1	18	0.85	-0.92	na	na
AGAP6	NM_001077665	0	0	na	na	70.9	59	0.83	-1.81	na	na
AGAP7	XM_003960859	0	0	na	na	3.8	4	1.04	-0.08	na	na
AGAP8	NM_001077686	0	0	na	na	5.7	5	0.87	-0.39	na	na
AGAP9	NM_001190810	0	0	na	na	4.8	5	1.04	-0.07	na	na
AGBL2	NM_024783	0	0	na	na	2.9	2	0.7	-0.61	na	na
AGMO	NM_001004320	0	0	na	na	4.8	4	0.84	-0.46	na	na
AHSA2	NM_152392	0	0	na	na	1103.5	1106	1	-2	na	na
AK4	NM_013410	6	0	na	na	2376.5	2455	1.03	-1.51	na	na
AK5	NM_174858	10	1	na	na	25.9	26	1.01	-0.49	na	na
AKAP14	NM_001008534	0	0	na	na	1.9	2	1.04	-0.07	na	na
AKAP2	NM_001004065	1	0.5	na	na	12.5	12	0.96	-0.37	na	na
AKR1B15	NM_001080538	2	0	na	na	7.7	2	0.26	-1.9	na	na
AKR7A3	NM_012067	0	0	na	na	7.7	7	0.91	-0.46	na	na
ALB	NM_000477	0	0	na	na	3.8	4	1.04	-0.08	na	na
ALDH1L1	NM_001270364	9	0.5	na	na	6.7	7	1.04	-0.18	na	na
ALDH3B1	NM_000694	0	0	na	na	3.8	7	1.83	0.87	na	na
ALDH8A1	NM_170771	1	0.5	na	na	22	36	1.63	1.34	na	na
ALOX12B	NM_001139	3	0	na	na	2.9	2	0.7	-0.61	na	na
ALOX15	NM_001140	1	0	na	na	2.9	7	2.44	1.36	na	na
ALOX15B	NM_001039131	0	0	na	na	35.4	47	1.33	0.71	na	na
ALOX5	NM_001256154	3	1	na	na	7.7	11	1.44	0.48	na	na
ALPK2	NM_052947	1	0	na	na	4.8	5	1.04	-0.07	na	na
ALPK3	NM_020778	2	0	na	na	31.6	23	0.73	-1.47	na	na
ALS2CR12	NM_001127391	0	0	na	na	11.5	13	1.13	0.04	na	na
ALS2CR8	NM_001104586	3	0	na	na	144.6	146	1.01	-1.02	na	na
AMDHD1	NM_152435	3	0.5	na	na	11.5	18	1.57	0.82	na	na
AMER3	NM_001105195	0	0.5	na	na	11.5	8	0.7	-1.02	na	na
AMHR2	NM_001164690	0	2.5	na	na	19.2	28	1.46	0.95	na	na
AMIGO2	NM_001143668	10	1	na	na	56.5	65	1.15	0.03	na	na
AMPD1	NM_001172626	0	0	na	na	12.5	11	0.88	-0.55	na	na
AMPD3	NM_001172430	7	1	na	na	23.9	29	1.21	0.3	na	na
AMT	NM_000481	1	0.5	na	na	25.9	28	1.08	-0.21	na	na
ANGPT2	NM_001118888	0	0	na	na	3.8	4	1.04	-0.08	na	na
ANGPTL6	NM_031917	2	0	na	na	16.3	14	0.86	-0.71	na	na
ANKAR	NM_144708	0	0	na	na	91	123	1.35	0.96	na	na
ANKDD1A	NM_182703	5	0.5	na	na	32.6	52	1.6	1.26	na	na
ANKDD1B	NM_001271529	0	0	na	na	1.9	2	1.04	-0.07	na	na
ANKLE1	NM_152363	0	0	na	na	60.3	58	0.96	-0.87	na	na
ANKRD1	NM_014391	4	0	na	na	9.6	16	1.67	0.97	na	na
ANKRD18B	NM_001244752	1	1.5	na	na	22	29	1.32	0.59	na	na
ANKRD2	NM_001129981	0	0	na	na	4.8	2	0.42	-1.28	na	na
ANKRD23	NM_144994	4	0.5	na	na	73.8	78	1.06	-0.45	na	na
ANKRD24	NM_133475	4	0.5	na	na	25.9	23	0.89	-0.78	na	na
ANKRD29	NM_173505	2	1	na	na	67.1	68	1.01	-0.69	na	na
ANKRD31	NM_001164443	4	0.5	na	na	19.2	21	1.1	-0.05	na	na
ANKRD36	NM_001164315	1	0	na	na	25.9	33	1.28	0.41	na	na
ANKRD36B	XM_003960306	6	0	na	na	18.2	16	0.88	-0.65	na	na
ANKRD36C	XM_003118857	6	0	na	na	9.6	16	1.67	0.97	na	na
ANKRD37	NM_181726	4	0	na	na	26.8	34	1.27	0.39	na	na
ANKRD53	NM_001115116	0	0	na	na	9.6	3	0.31	-2.12	na	na
ANKRD61	NM_001271700	2	0	na	na	4.8	4	0.84	-0.46	na	na
ANKRD62	XM_001715728	0	0	na	na	15.3	10	0.65	-1.28	na	na
ANKRD7	NM_019644	4	1	na	na	21.1	24	1.14	0.08	na	na
ANKS1B	NM_020140	0	0	na	na	5.7	5	0.87	-0.39	na	na
ANO1	NM_018043	2	0	na	na	5.7	3	0.52	-1.25	na	na
ANO2	NM_020373	0	0	na	na	4.8	6	1.25	0.24	na	na
ANO4	NM_178826	4	1	na	na	35.4	34	0.96	-0.69	na	na
ANPEP	NM_001150	0	0	na	na	4.8	3	0.63	-0.94	na	na
ANXA2R	NM_001014279	0	0.5	na	na	12.5	27	2.17	2.08	na	na
ANXA9	NM_003568	2	0	na	na	2.9	2	0.7	-0.61	na	na
AOC2	NM_009590	2	0	na	na	82.4	84	1.02	-0.78	na	na
AOC3	NM_003734	0	0	na	na	33.5	49	1.46	1.12	na	na
AOX1	NM_001159	0	0	na	na	4.8	3	0.63	-0.94	na	na
AP1M2	NM_005498	0	0	na	na	3.8	2	0.52	-0.99	na	na
AP1S2	NM_001272071	44	0.5	na	na	1126.5	1378	1.22	0.51	na	na
APCDD1	NM_153000	7	0.5	na	na	59.4	80	1.35	0.92	na	na
APLN	NM_017413	3	1	na	na	55.6	53	0.95	-0.9	na	na
APOA1	NM_000039	0	0	na	na	15.3	14	0.91	-0.53	na	na
APOBEC3D	NM_152426	0	0.5	na	na	14.4	14	0.97	-0.34	na	na
APOBEC3F	NM_001006666	1	1	na	na	8.6	13	1.51	0.73	na	na
APOBEC3G	NM_021822	0	0.5	na	na	2.9	3	1.04	-0.08	na	na
APOBR	NM_018690	0	0	na	na	8.6	8	0.93	-0.44	na	na
APOD	NM_001647	1	0	na	na	2.9	4	1.39	0.41	na	na
APOL1	NM_145343	0	0	na	na	8.6	7	0.81	-0.7	na	na
APOL4	NM_145660	0	0	na	na	76.6	85	1.11	-0.26	na	na
APOLD1	NM_001130415	7	0.5	na	na	142.7	129	0.9	-1.79	na	na
AQP1	NM_001185062	1	0	na	na	16.3	13	0.8	-0.94	na	na
AQP11	NM_173039	10	1	na	na	37.4	32	0.86	-1.1	na	na
AQP6	NM_001652	0	0	na	na	8.6	13	1.51	0.73	na	na
AQPEP	NM_173800	0	0	na	na	5.7	13	2.26	1.42	na	na
ARGFX	NM_001012659	0	0	na	na	46	50	1.09	-0.25	na	na
ARHGAP11B	NM_001039841	0	0	na	na	8.6	12	1.39	0.54	na	na
ARHGAP19	NM_001204300	0	0.5	na	na	1494.3	1752	1.17	-0.03	na	na
ARHGAP23	NM_001199417	6	1	na	na	46.9	42	0.89	-0.99	na	na
ARHGAP36	NM_144967	1	0	na	na	1.9	5	2.61	1.13	na	na
ARHGAP4	NM_001666	0	0	na	na	19.2	14	0.73	-1.2	na	na
ARHGAP40	NM_001164431	0	0	na	na	2.9	6	2.09	1.1	na	na
ARHGAP9	NM_001080156	3	0	na	na	9.6	5	0.52	-1.26	na	na
ARHGEF10L	NM_018125	18	1	na	na	124.5	132	1.06	-0.68	na	na
ARHGEF33	NM_001145451	0	0	na	na	6.7	14	2.09	1.26	na	na
ARHGEF37	NM_001001669	8	0.5	na	na	42.1	61	1.45	1.08	na	na
ARID3C	NM_001017363	2	0	na	na	6.7	2	0.3	-1.72	na	na
ARIH2OS	NM_001123040	1	1	na	na	40.2	60	1.49	1.21	na	na
ARL11	NM_138450	0	0	na	na	12.5	13	1.04	-0.13	na	na
ARL17A	NM_016632	4	1	na	na	38.3	45	1.17	0.18	na	na
ARMC12	NM_145028	0	0	na	na	5.7	7	1.22	0.19	na	na
ARMC2	NM_032131	22	1	na	na	74.7	79	1.06	-0.45	na	na
ARMCX1	NM_016608	0	0	na	na	2.9	2	0.7	-0.61	na	na
ARTN	NM_001136215	0	0	na	na	9.6	15	1.57	0.82	na	na
ARX	NM_139058	0	0	na	na	10.5	9	0.85	-0.63	na	na
ASAH2	NM_001143974	5	0	na	na	16.3	12	0.74	-1.18	na	na
ASAH2B	NM_001079516	4	0	na	na	7.7	11	1.44	0.48	na	na
ASB12	NM_130388	2	0	na	na	5.7	5	0.87	-0.39	na	na
ASCL1	NM_004316	0	0	na	na	2.9	6	2.09	1.1	na	na
ASGR1	NM_001671	8	0	na	na	23	34	1.48	0.99	na	na
ASIC3	NM_020321	0	0.5	na	na	60.3	50	0.83	-1.61	na	na
ASIC4	NM_182847	0	0	na	na	4.8	11	2.3	1.27	na	na
ASMT	NM_004043	0	0	na	na	2.9	6	2.09	1.1	na	na
ASPHD1	NM_181718	4	1	na	na	41.2	51	1.24	0.41	na	na
ASPRV1	NM_152792	0	0.5	na	na	25.9	28	1.08	-0.21	na	na
ATAD3C	NM_001039211	0	0	na	na	24.9	24	0.96	-0.65	na	na
ATG9B	NM_173681	3	0.5	na	na	15.3	25	1.63	1.22	na	na
ATOH7	NM_145178	2	0	na	na	16.3	11	0.68	-1.2	na	na
ATOH8	NM_032827	5	0	na	na	10.5	9	0.85	-0.63	na	na
ATP12A	NM_001676	1	0	na	na	6.7	13	1.94	1.1	na	na
ATP2B3	NM_001001344	10	0.5	na	na	8.6	16	1.86	1.23	na	na
ATP4A	NM_000704	0	0	na	na	2.9	4	1.39	0.41	na	na
ATP6AP1L	NM_001017971	2	0.5	na	na	30.7	41	1.34	0.59	na	na
ATP6V0D2	NM_152565	0	0	na	na	12.5	14	1.12	0.1	na	na
ATP6V1B1	NM_001692	5	0.5	na	na	40.2	63	1.57	1.42	na	na
ATP6V1C2	NM_144583	20	0.5	na	na	63.2	69	1.09	-0.27	na	na
ATP6V1E2	NM_080653	3	0	na	na	35.4	24	0.68	-1.99	na	na
ATP6V1G2	NM_138282	3	0	na	na	33.5	38	1.13	0.03	na	na
ATP8A2	NM_016529	3	0	na	na	9.6	13	1.36	0.48	na	na
ATP8B1	NM_005603	6	1	na	na	16.3	28	1.72	1.38	na	na
ATP8B3	NM_138813	8	1	na	na	41.2	23	0.56	-2.39	na	na
ATP8B4	NM_024837	0	0	na	na	8.6	5	0.58	-1.08	na	na
AURKC	NM_001015879	9	0.5	na	na	8.6	9	1.04	-0.15	na	na
AUTS2	NM_001127232	6	0.5	na	na	56.5	64	1.13	-0.04	na	na
AVPR1A	NM_000706	2	1	na	na	23.9	23	0.96	-0.51	na	na
AWAT1	NM_001013579	0	0	na	na	5.7	5	0.87	-0.39	na	na
AXDND1	NM_144696	1	0.5	na	na	6.7	13	1.94	1.1	na	na
AXL	NM_001699	0	0	na	na	9.6	5	0.52	-1.26	na	na
B3GNT3	NM_014256	2	0	na	na	6.7	9	1.34	0.34	na	na
B3GNT8	NM_198540	3	0	na	na	9.6	4	0.42	-1.64	na	na
BAALC	NM_024812	0	0	na	na	14.4	15	1.04	-0.13	na	na
BAAT	NM_001127610	1	0	na	na	9.6	3	0.31	-2.12	na	na
BAIAP2L2	NM_025045	0	0.5	na	na	3.8	3	0.78	-0.56	na	na
BATF2	NM_138456	4	0.5	na	na	11.5	22	1.91	1.3	na	na
BCAN	NM_198427	3	0	na	na	1.9	2	1.04	-0.07	na	na
BCL2L15	NM_001010922	0	0	na	na	26.8	31	1.16	0.04	na	na
BCL2L2	NM_001199839	5	0	na	na	1087.2	1150	1.06	-1.19	na	na
BCMO1	NM_017429	0	0.5	na	na	2.9	2	0.7	-0.61	na	na
BDKRB2	NM_000623	0	0	na	na	6.7	9	1.34	0.34	na	na
BDNF	NM_001143808	0	0	na	na	6.7	6	0.89	-0.5	na	na
BEAN1	NM_001136106	1	0	na	na	4.8	10	2.09	1.11	na	na
BEND5	NM_024603	1	0	na	na	6.7	6	0.89	-0.5	na	na
BEND6	NM_152731	0	0	na	na	29.7	44	1.48	0.98	na	na
BEST1	NM_004183	0	0	na	na	5.7	17	2.96	1.98	na	na
BEST3	NM_152439	0	0	na	na	4.8	3	0.63	-0.94	na	na
BEST4	NM_153274	0	0	na	na	1.9	5	2.61	1.13	na	na
BGN	NM_001711	0	0	na	na	1.9	3	1.57	0.46	na	na
BHLHE22	NM_152414	1	0.5	na	na	7.7	8	1.04	-0.18	na	na
BIK	NM_001197	6	0.5	na	na	7.7	17	2.22	1.38	na	na
BIRC3	NM_182962	0	0.5	na	na	8.6	15	1.74	1.07	na	na
BIVM	NM_017693	2	0	na	na	556.5	655	1.18	0.13	na	na
BLNK	NM_001258441	1	0.5	na	na	3.8	2	0.52	-0.99	na	na
BLOC1S5	NM_001199323	0	0	na	na	2.9	5	1.74	0.79	na	na
BMP5	NM_021073	0	0	na	na	1.9	4	2.09	0.84	na	na
BMP8A	NM_181809	0	0	na	na	24.9	42	1.69	1.47	na	na
BMP8B	NM_001720	6	1	na	na	96.7	121	1.25	0.54	na	na
BNIPL	NM_138278	0	0.5	na	na	18.2	20	1.1	-0.04	na	na
BRICD5	NM_182563	0	0	na	na	34.5	31	0.9	-0.91	na	na
BSCL2	NM_001130702	0	0	na	na	17.2	20	1.16	0.19	na	na
BST1	NM_004334	0	0	na	na	13.4	14	1.04	-0.13	na	na
BST2	NM_004335	3	1	na	na	13.4	10	0.75	-0.96	na	na
BTK	NM_000061	0	0	na	na	1.9	5	2.61	1.13	na	na
BTN3A3	NM_006994	1	0.5	na	na	14.4	21	1.46	0.89	na	na
C10orf107	NM_173554	2	0	na	na	4.8	9	1.88	0.93	na	na
C10orf11	NM_032024	2	0	na	na	5.7	9	1.57	0.62	na	na
C10orf111	NM_153244	1	0	na	na	26.8	26	0.97	-0.63	na	na
C10orf131	NM_001130446	2	0.5	na	na	16.3	15	0.92	-0.51	na	na
C10orf25	NM_001039380	3	0	na	na	30.7	36	1.17	0.1	na	na
C10orf32	NM_001136200	0	0	na	na	572.8	725	1.27	0.84	na	na
C10orf54	NM_022153	6	0.5	na	na	11.5	7	0.61	-1.3	na	na
C10orf62	NM_001009997	0	0	na	na	2.9	5	1.74	0.79	na	na
C10orf67	NM_153714	1	0	na	na	20.1	16	0.8	-0.95	na	na
C10orf68	NM_024688	0	0	na	na	3.8	6	1.57	0.61	na	na
C10orf82	NM_144661	7	1	na	na	16.3	17	1.04	-0.13	na	na
C10orf95	NM_024886	0	0	na	na	8.6	12	1.39	0.54	na	na
C11orf35	NM_173573	0	0	na	na	23.9	14	0.58	-1.88	na	na
C11orf44	NM_001271983	0	0	na	na	2.9	5	1.74	0.79	na	na
C11orf63	NM_199124	10	1	na	na	57.5	54	0.94	-0.98	na	na
C11orf70	NM_001195005	3	0	na	na	12.5	12	0.96	-0.37	na	na
C11orf91	NM_001166692	0	0	na	na	5.7	3	0.52	-1.25	na	na
C12orf28	XM_001716650	0	0	na	na	1.9	4	2.09	0.84	na	na
C12orf39	NM_030572	1	0.5	na	na	15.3	7	0.46	-1.9	na	na
C12orf61	NM_175895	1	0.5	na	na	7.7	9	1.17	0.06	na	na
C12orf70	NM_001145010	0	0	na	na	8.6	5	0.58	-1.08	na	na
C12orf75	NM_001145199	4	0.5	na	na	1537.4	1542	1	-1.92	na	na
C13orf45	NM_001257995	0	0	na	na	1.9	3	1.57	0.46	na	na
C14orf169	NM_024644	0	0	na	na	1.9	2	1.04	-0.07	na	na
C14orf178	NM_174943	0	0	na	na	9.6	4	0.42	-1.64	na	na
C14orf28	NM_001017923	1	0	na	na	141.8	158	1.11	-0.33	na	na
C14orf39	NM_174978	1	0.5	na	na	15.3	10	0.65	-1.28	na	na
C15orf26	NM_173528	1	0	na	na	2.9	6	2.09	1.1	na	na
C15orf38	NM_182616	2	0	na	na	313.2	359	1.15	-0.1	na	na
C15orf48	NM_197955	0	0	na	na	22	18	0.82	-1.07	na	na
C15orf59	NM_001039614	0	0	na	na	124.5	116	0.93	-1.39	na	na
C15orf62	NM_001130448	0	0	na	na	3.8	9	2.35	1.31	na	na
C16orf11	NM_145270	5	0	na	na	11.5	5	0.43	-1.57	na	na
C16orf45	NM_001142469	1	0.5	na	na	32.6	23	0.71	-1.58	na	na
C16orf46	NM_152337	4	1	na	na	18.2	30	1.65	1.37	na	na
C16orf52	NM_001164579	2	0	na	na	447.3	528	1.18	0.26	na	na
C16orf71	NM_139170	4	0.5	na	na	7.7	18	2.35	1.5	na	na
C16orf74	NM_206967	4	0.5	na	na	125.5	127	1.01	-1	na	na
C16orf89	NM_152459	0	0	na	na	12.5	11	0.88	-0.55	na	na
C16orf96	NM_001145011	4	1	na	na	5.7	11	1.91	1.08	na	na
C17orf100	NM_001105520	5	1	na	na	110.2	147	1.33	0.96	na	na
C17orf107	NM_001145536	0	0	na	na	6.7	8	1.19	0.1	na	na
C17orf49	NM_001142799	0	0	na	na	2.9	2	0.7	-0.61	na	na
C17orf67	NM_001085430	0	0	na	na	106.3	119	1.12	-0.19	na	na
C17orf72	NM_001191029	0	0	na	na	7.7	7	0.91	-0.46	na	na
C17orf82	NM_203425	0	0	na	na	3.8	6	1.57	0.61	na	na
C17orf97	NM_001013672	8	0.5	na	na	36.4	49	1.35	0.77	na	na
C19orf38	NM_001136482	3	0	na	na	1.9	3	1.57	0.46	na	na
C19orf66	NM_018381	3	1	na	na	25.9	16	0.62	-1.71	na	na
C1orf101	NM_173807	1	0	na	na	25.9	22	0.85	-0.93	na	na
C1orf162	NM_174896	0	0	na	na	8.6	13	1.51	0.73	na	na
C1orf167	XM_003119773	0	0	na	na	4.8	7	1.46	0.5	na	na
C1orf172	NM_152365	3	0.5	na	na	3.8	7	1.83	0.87	na	na
C1orf173	NM_001002912	0	0	na	na	3.8	2	0.52	-0.99	na	na
C1orf216	NM_152374	0	0	na	na	216.5	242	1.12	-0.27	na	na
C1orf227	NM_001024601	0	0	na	na	4.8	5	1.04	-0.07	na	na
C1orf228	NM_001145636	0	0.5	na	na	1.9	3	1.57	0.46	na	na
C1orf229	NM_207401	1	0	na	na	16.3	17	1.04	-0.13	na	na
C1orf51	NM_144697	6	1	na	na	18.2	22	1.21	0.29	na	na
C1orf61	NM_006365	1	0.5	na	na	25.9	37	1.43	0.84	na	na
C1orf95	NM_001003665	6	1	na	na	253.8	233	0.92	-2.07	na	na
C1QTNF1	NM_198594	8	0	na	na	39.3	38	0.97	-0.65	na	na
C1QTNF4	NM_031909	3	0.5	na	na	4.8	9	1.88	0.93	na	na
C1QTNF6	NM_182486	3	1	na	na	52.7	56	1.06	-0.36	na	na
C1QTNF9B-AS1	NM_001014442	2	0.5	na	na	34.5	45	1.3	0.64	na	na
C1S	NM_001734	0	0	na	na	23.9	22	0.92	-0.66	na	na
C20orf201	NM_001007125	2	0.5	na	na	4.8	6	1.25	0.24	na	na
C20orf26	NM_001167816	2	0	na	na	2.9	2	0.7	-0.61	na	na
C21orf7	NM_020152	0	0.5	na	na	8.6	6	0.7	-1.02	na	na
C22orf24	NM_015372	0	1	na	na	10.5	9	0.85	-0.63	na	na
C22orf26	NM_018280	0	0	na	na	5.7	4	0.7	-0.77	na	na
C22orf43	NM_016449	0	0	na	na	6.7	7	1.04	-0.18	na	na
C2CD2	NM_199050	0	0	na	na	4.8	4	0.84	-0.46	na	na
C2CD4A	NM_207322	3	0	na	na	13.4	13	0.97	-0.35	na	na
C2orf27A	NM_013310	0	0	na	na	21.1	30	1.42	0.86	na	na
C2orf27B	NM_214461	0	0	na	na	1.9	9	4.7	1.91	na	na
C2orf48	NM_182626	5	0.5	na	na	30.7	39	1.27	0.4	na	na
C2orf50	NM_182500	0	0	na	na	3.8	2	0.52	-0.99	na	na
C2orf66	NM_213608	0	0	na	na	3.8	6	1.57	0.61	na	na
C2orf81	NM_001145054	1	1	na	na	34.5	48	1.39	0.91	na	na
C2orf82	NM_206895	0	0	na	na	4.8	8	1.67	0.73	na	na
C2orf88	NM_032321	0	1	na	na	50.8	67	1.32	0.72	na	na
C3	NM_000064	4	0	na	na	19.2	15	0.78	-1	na	na
C3orf18	NM_001171741	2	0.5	na	na	113	131	1.16	0.04	na	na
C3orf20	NM_001184957	0	0	na	na	11.5	13	1.13	0.04	na	na
C3orf35	NM_178342	0	0	na	na	17.2	15	0.87	-0.68	na	na
C3orf62	NM_198562	0	0	na	na	215.5	234	1.09	-0.54	na	na
C3orf72	NM_001040061	0	0.5	na	na	39.3	68	1.73	1.85	na	na
C4orf19	NM_018302	2	0	na	na	11.5	14	1.22	0.22	na	na
C4orf36	NM_144645	1	0	na	na	18.2	14	0.77	-1.05	na	na
C4orf47	NM_001114357	1	0.5	na	na	10.5	8	0.76	-0.84	na	na
C5	NM_001735	5	0.5	na	na	23	30	1.3	0.56	na	na
C5AR1	NM_001736	2	0.5	na	na	14.4	25	1.74	1.41	na	na
C5orf49	NM_001089584	1	0	na	na	4.8	2	0.42	-1.28	na	na
C5orf60	NM_001142306	0	0	na	na	4.8	5	1.04	-0.07	na	na
C6orf118	NM_144980	2	0	na	na	10.5	15	1.42	0.59	na	na
C6orf141	NM_001145652	0	0	na	na	18.2	14	0.77	-1.05	na	na
C6orf163	NM_001010868	0	0	na	na	4.8	12	2.51	1.42	na	na
C6orf165	NM_001031743	7	0.5	na	na	17.2	28	1.62	1.32	na	na
C6orf52	NM_001145020	7	0.5	na	na	23.9	24	1	-0.36	na	na
C6orf58	NM_001010905	0	0	na	na	1.9	4	2.09	0.84	na	na
C6orf7	NM_001243308	0	0	na	na	5.7	4	0.7	-0.77	na	na
C6orf99	NM_001195032	4	0.5	na	na	10.5	9	0.85	-0.63	na	na
C7orf53	NM_001134468	0	0	na	na	20.1	26	1.29	0.52	na	na
C7orf57	NM_001100159	4	0	na	na	15.3	14	0.91	-0.53	na	na
C7orf61	NM_001004323	0	0	na	na	1.9	4	2.09	0.84	na	na
C7orf69	NM_025031	0	0	na	na	3.8	4	1.04	-0.08	na	na
C8orf31	NM_173687	0	0	na	na	18.2	38	2.09	2.19	na	na
C8orf4	NM_020130	0	1	na	na	4.8	8	1.67	0.73	na	na
C8orf42	NM_175075	0	0.5	na	na	84.3	86	1.02	-0.77	na	na
C8orf44	NM_019607	3	0	na	na	41.2	61	1.48	1.18	na	na
C8orf46	NM_152765	0	0	na	na	14.4	18	1.25	0.42	na	na
C8orf47	NM_001170806	3	0	na	na	42.1	57	1.35	0.79	na	na
C8orf48	NM_001007090	1	0	na	na	20.1	22	1.09	-0.06	na	na
C9orf135	NM_001010940	1	0	na	na	2.9	3	1.04	-0.08	na	na
C9orf139	NM_207511	0	0	na	na	2.9	5	1.74	0.79	na	na
C9orf163	NM_152571	0	0	na	na	29.7	39	1.31	0.52	na	na
C9orf169	NM_199001	0	0	na	na	33.5	40	1.19	0.25	na	na
C9orf171	NM_207417	4	0	na	na	24.9	19	0.76	-1.31	na	na
C9orf172	NM_001080482	1	0.5	na	na	10.5	13	1.23	0.25	na	na
C9orf43	NM_152786	1	0	na	na	13.4	19	1.42	0.79	na	na
C9orf66	NM_152569	2	0.5	na	na	18.2	24	1.32	0.59	na	na
C9orf96	NM_153710	0	0	na	na	4.8	7	1.46	0.5	na	na
CA14	NM_012113	1	0	na	na	8.6	2	0.23	-2.06	na	na
CA3	NM_005181	0	0	na	na	2.9	4	1.39	0.41	na	na
CAB39L	NM_001079670	5	1	na	na	74.7	96	1.28	0.65	na	na
CABP7	NM_182527	0	0	na	na	13.4	8	0.6	-1.34	na	na
CACNA1A	NM_001127221	0	0	na	na	2.9	9	3.13	1.79	na	na
CACNA1B	NM_001243812	0	0	na	na	4.8	7	1.46	0.5	na	na
CACNA1C	NM_001167624	8	1	na	na	40.2	52	1.29	0.6	na	na
CACNA1D	NM_001128839	9	1	na	na	69.9	76	1.09	-0.3	na	na
CACNA1E	NM_001205294	0	0	na	na	3.8	4	1.04	-0.08	na	na
CACNA1S	NM_000069	0	0	na	na	1.9	2	1.04	-0.07	na	na
CACNB1	NM_199247	1	1.5	na	na	38.3	43	1.12	-0.01	na	na
CACNB4	NM_001145798	13	0.5	na	na	447.3	522	1.17	0.14	na	na
CACNG4	NM_014405	1	0	na	na	8.6	8	0.93	-0.44	na	na
CACNG6	NM_031897	0	0	na	na	3.8	8	2.09	1.11	na	na
CACNG7	NM_031896	0	0	na	na	5.7	9	1.57	0.62	na	na
CADPS	NM_183393	0	0	na	na	3.8	6	1.57	0.61	na	na
CAGE1	NM_001170693	0	0	na	na	4.8	12	2.51	1.42	na	na
CALCR	NM_001742	0	0	na	na	2.9	2	0.7	-0.61	na	na
CALHM2	NM_015916	0	0.5	na	na	20.1	22	1.09	-0.06	na	na
CALML6	NM_138705	0	0	na	na	2.9	2	0.7	-0.61	na	na
CALR3	NM_145046	0	0	na	na	6.7	3	0.45	-1.52	na	na
CAMK2A	NM_171825	0	0	na	na	2.9	3	1.04	-0.08	na	na
CAMK2N1	NM_018584	7	1	na	na	434.9	579	1.33	1.55	na	na
CAMK2N2	NM_033259	8	1	na	na	45	83	1.84	2.4	na	na
CAPN12	NM_144691	1	0	na	na	5.7	9	1.57	0.66	na	na
CAPN14	NM_001145122	0	0	na	na	4.8	9	1.88	0.93	na	na
CAPN3	NM_173088	0	0	na	na	13.4	12	0.89	-0.59	na	na
CAPN9	NM_006615	0	0.5	na	na	2.9	3	1.04	-0.08	na	na
CAPS	NM_004058	0	0	na	na	22	21	0.95	-0.53	na	na
CAPS2	NM_032606	5	0.5	na	na	20.1	28	1.39	0.78	na	na
CARD9	NM_052813	0	0	na	na	6.7	11	1.64	0.76	na	na
CARNS1	NM_020811	0	0.5	na	na	10.5	7	0.66	-1.12	na	na
CASC1	NM_001082973	2	0	na	na	15.3	16	1.04	-0.13	na	na
CASS4	NM_001164115	0	0	na	na	6.7	8	1.19	0.1	na	na
CATSPER2	NM_172097	0	0	na	na	9.6	8	0.84	-0.64	na	na
CATSPER3	NM_178019	1	0	na	na	7.7	10	1.3	0.28	na	na
CATSPERD	NM_152784	1	0	na	na	1.9	5	2.61	1.13	na	na
CATSPERG	NM_021185	1	0.5	na	na	7.7	9	1.17	0.06	na	na
CBFA2T3	NM_005187	8	1	na	na	46.9	44	0.94	-0.79	na	na
CBLN1	NM_004352	4	0	na	na	14.4	20	1.39	0.74	na	na
CBLN3	NM_001039771	1	0	na	na	21.1	14	0.66	-1.49	na	na
CBWD2	NM_172003	2	0	na	na	23	25	1.09	-0.08	na	na
CBWD5	NM_001024916	2	0.5	na	na	4.8	9	1.88	0.93	na	na
CBWD6	NM_001085457	0	0	na	na	1.9	3	1.57	0.46	na	na
CBX7	NM_175709	9	0	na	na	280.7	266	0.95	-1.83	na	na
CC2D2A	NM_020785	4	0.5	na	na	60.3	74	1.23	0.39	na	na
CC2D2B	NM_001001732	0	0	na	na	2.9	3	1.04	-0.08	na	na
CCBP2	NM_001296	1	1.5	na	na	16.3	15	0.92	-0.51	na	na
CCDC102B	NM_024781	0	0.5	na	na	2.9	6	2.09	1.1	na	na
CCDC108	NM_152389	0	0	na	na	13.4	14	1.04	-0.13	na	na
CCDC11	NM_145020	0	0.5	na	na	10.5	11	1.04	-0.15	na	na
CCDC114	NM_144577	1	0.5	na	na	7.7	19	2.48	1.61	na	na
CCDC116	NM_152612	1	0	na	na	12.5	10	0.8	-0.78	na	na
CCDC122	NM_144974	14	1	na	na	99.6	129	1.29	0.76	na	na
CCDC13	NM_144719	0	0	na	na	15.3	17	1.11	0.05	na	na
CCDC146	XM_003960934	1	0.5	na	na	60.3	64	1.06	-0.44	na	na
CCDC147	NM_001008723	0	0	na	na	3.8	6	1.57	0.61	na	na
CCDC148	NM_001171637	2	0	na	na	44.1	35	0.79	-1.5	na	na
CCDC153	NM_001145018	7	0.5	na	na	5.7	13	2.26	1.42	na	na
CCDC154	NM_001143980	1	0	na	na	1.9	3	1.57	0.46	na	na
CCDC160	NM_001101357	0	0	na	na	4.8	8	1.67	0.73	na	na
CCDC164	NM_145038	0	0	na	na	3.8	3	0.78	-0.56	na	na
CCDC168	NM_001146197	0	0.5	na	na	7.7	10	1.3	0.28	na	na
CCDC17	NM_001190182	0	0	na	na	2.9	13	4.52	2.41	na	na
CCDC173	NM_001085447	4	0.5	na	na	35.4	45	1.27	0.52	na	na
CCDC175	NM_001164399	0	0	na	na	1.9	6	3.13	1.37	na	na
CCDC176	NM_025057	6	0.5	na	na	120.7	139	1.15	-0.1	na	na
CCDC177	NM_001271507	3	0.5	na	na	10.5	11	1.04	-0.15	na	na
CCDC178	NM_198995	1	0	na	na	6.7	5	0.75	-0.65	na	na
CCDC30	NM_001080850	0	0.5	na	na	16.3	14	0.86	-0.71	na	na
CCDC42B	NM_001144872	0	0	na	na	5.7	10	1.74	0.88	na	na
CCDC62	NM_201435	4	0	na	na	25.9	29	1.12	-0.08	na	na
CCDC64	NM_207311	1	0	na	na	69	91	1.32	0.8	na	na
CCDC64B	NM_001103175	1	0.5	na	na	14.4	12	0.84	-0.8	na	na
CCDC68	NM_001143829	0	0	na	na	15.3	17	1.11	0.05	na	na
CCDC69	NM_015621	4	0	na	na	196.4	202	1.03	-0.93	na	na
CCDC7	NM_001026383	3	0.5	na	na	22	21	0.95	-0.53	na	na
CCDC73	NM_001008391	0	0	na	na	10.5	3	0.28	-2.28	na	na
CCDC74A	NM_001258305	0	0	na	na	16.3	18	1.11	0.04	na	na
CCDC74B	NM_001258307	0	0	na	na	9.6	8	0.84	-0.64	na	na
CCDC78	NM_001031737	0	0	na	na	48.9	40	0.82	-1.37	na	na
CCDC81	NM_001156474	0	0.5	na	na	6.7	12	1.79	0.94	na	na
CCDC88B	NM_032251	8	1	na	na	34.5	36	1.04	-0.32	na	na
CCIN	NM_005893	1	1	na	na	6.7	3	0.45	-1.52	na	na
CCL27	NM_006664	0	0	na	na	5.7	7	1.22	0.19	na	na
CCM2L	NM_080625	3	0	na	na	14.4	13	0.9	-0.56	na	na
CCR6	NM_004367	0	1	na	na	15.3	39	2.54	2.56	na	na
CCR7	NM_001838	0	0	na	na	1.9	3	1.57	0.46	na	na
CCZ1	NM_015622	0	0	na	na	10.5	20	1.9	1.28	na	na
CCZ1B	NM_198097	3	0.5	na	na	20.1	24	1.19	0.25	na	na
CD101	NM_001256109	1	0.5	na	na	51.7	34	0.66	-2.31	na	na
CD14	NM_001174105	0	0.5	na	na	8.6	19	2.2	1.64	na	na
CD207	NM_015717	4	0.5	na	na	30.7	30	0.98	-0.59	na	na
CD226	NM_006566	0	0.5	na	na	2.9	3	1.04	-0.08	na	na
CD24	NM_013230	3	0.5	na	na	100.6	100	0.99	-0.97	na	na
CD274	NM_001267706	1	0	na	na	3.8	9	2.35	1.31	na	na
CD300LB	NM_174892	0	0	na	na	1.9	2	1.04	-0.07	na	na
CD302	NM_001198763	6	0.5	na	na	15.3	26	1.7	1.34	na	na
CD34	NM_001025109	1	0.5	na	na	6.7	6	0.89	-0.5	na	na
CD36	NM_001127443	0	0.5	na	na	1.9	2	1.04	-0.07	na	na
CD4	NM_000616	0	0	na	na	2.9	2	0.7	-0.61	na	na
CD68	NM_001040059	4	0	na	na	15.3	20	1.3	0.54	na	na
CD7	NM_006137	4	0.5	na	na	9.6	5	0.52	-1.26	na	na
CD72	NM_001782	1	0	na	na	21.1	12	0.57	-1.61	na	na
CD79A	NM_021601	2	0	na	na	3.8	2	0.52	-0.99	na	na
CD8A	NM_001768	0	0	na	na	20.1	23	1.14	0.1	na	na
CD96	NM_005816	0	0	na	na	1.9	5	2.61	1.13	na	na
CDH10	NM_006727	4	0	na	na	17.2	14	0.81	-0.89	na	na
CDH11	NM_001797	1	0	na	na	2.9	2	0.7	-0.61	na	na
CDH15	NM_004933	0	0	na	na	3.8	5	1.3	0.3	na	na
CDH17	NM_004063	0	0	na	na	5.7	12	2.09	1.26	na	na
CDH18	NM_001167667	2	0	na	na	3.8	2	0.52	-0.99	na	na
CDH22	NM_021248	1	0.5	na	na	6.7	11	1.64	0.76	na	na
CDH23	NM_052836	0	0	na	na	14.4	13	0.9	-0.56	na	na
CDH26	NM_177980	0	0	na	na	23	34	1.48	0.99	na	na
CDH3	NM_001793	14	1	na	na	21.1	32	1.52	1.08	na	na
CDH6	NM_004932	0	0	na	na	3.8	10	2.61	1.49	na	na
CDH8	NM_001796	0	0	na	na	3.8	2	0.52	-0.99	na	na
CDHR3	NM_152750	0	0	na	na	55.6	69	1.24	0.42	na	na
CDK11A	NM_033529	6	0	na	na	228.9	254	1.11	-0.34	na	na
CDK15	NM_001261436	2	0	na	na	1.9	5	2.61	1.13	na	na
CDK5R2	NM_003936	0	0	na	na	7.7	16	2.09	1.26	na	na
CDKL4	NM_001009565	0	0	na	na	1.9	5	2.61	1.13	na	na
CDKN2B	NM_078487	0	0.5	na	na	239.5	226	0.94	-1.82	na	na
CDNF	NM_001029954	3	0	na	na	33.5	30	0.89	-0.93	na	na
CDR2	NM_001802	4	1	na	na	44.1	48	1.09	-0.14	na	na
CDYL2	NM_152342	3	0	na	na	9.6	6	0.63	-1.24	na	na
CEACAM19	NM_001127893	0	0	na	na	40.2	41	1.02	-0.43	na	na
CECR1	NM_017424	0	0	na	na	17.2	10	0.58	-1.56	na	na
CEL	NM_001807	0	0	na	na	12.5	8	0.64	-1.19	na	na
CELF3	NM_001172649	2	0	na	na	16.3	58	3.56	3.57	na	na
CELF4	NM_001025089	6	0.5	na	na	38.3	44	1.15	0.09	na	na
CELF5	NM_001172673	7	0.5	na	na	82.4	95	1.15	-0.02	na	na
CELF6	NM_001172685	1	0	na	na	6.7	7	1.04	-0.18	na	na
CEP112	NM_001037325	7	1	na	na	52.7	63	1.2	0.23	na	na
CEP19	NM_032898	10	1	na	na	167.6	204	1.22	0.47	na	na
CERKL	NM_001030312	2	1	na	na	30.7	48	1.57	1.19	na	na
CERS1	NM_198207	0	0	na	na	247.1	242	0.98	-1.48	na	na
CFH	NM_001014975	0	0	na	na	1.9	3	1.57	0.46	na	na
CFHR3	NM_021023	1	1	na	na	18.2	12	0.66	-1.25	na	na
CFP	NM_001145252	0	0	na	na	6.7	9	1.34	0.34	na	na
CGA	NM_000735	0	0	na	na	5.7	2	0.35	-1.52	na	na
CHD5	NM_015557	1	0	na	na	37.4	33	0.88	-0.98	na	na
CHGA	NM_001275	16	0	na	na	12.5	35	2.81	2.86	na	na
CHGB	NM_001819	2	0	na	na	6.7	18	2.68	1.78	na	na
CHODL	NM_001204177	8	0.5	na	na	27.8	39	1.4	0.77	na	na
CHRDL1	NM_145234	2	0.5	na	na	17.2	22	1.28	0.48	na	na
CHRFAM7A	NM_139320	0	0	na	na	30.7	28	0.91	-0.85	na	na
CHRM3	NM_000740	0	0	na	na	9.6	8	0.84	-0.64	na	na
CHRM4	NM_000741	4	0.5	na	na	4.8	11	2.3	1.27	na	na
CHRNA10	NM_020402	0	0	na	na	25.9	27	1.04	-0.35	na	na
CHRNA9	NM_017581	3	0.5	na	na	2.9	5	1.74	0.79	na	na
CHRNB4	NM_000750	3	0	na	na	10.5	17	1.61	0.89	na	na
CHRNE	NM_000080	1	0	na	na	4.8	4	0.84	-0.46	na	na
CHST1	NM_003654	1	0	na	na	26.8	18	0.67	-1.75	na	na
CHST2	NM_004267	13	1	na	na	190.6	213	1.12	-0.26	na	na
CHST5	NM_024533	0	0	na	na	18.2	12	0.66	-1.25	na	na
CHST8	NM_001127896	11	1	na	na	41.2	52	1.26	0.49	na	na
CHST9	NM_031422	8	0.5	na	na	40.2	52	1.29	0.6	na	na
CKM	NM_001824	3	0.5	na	na	4.8	4	0.84	-0.46	na	na
CKMT1A	NM_001015001	3	0.5	na	na	4.8	3	0.63	-0.94	na	na
CKMT1B	XM_003960586	2	0	na	na	5.7	7	1.22	0.19	na	na
CLCF1	NM_001166212	0	0	na	na	8.6	12	1.39	0.54	na	na
CLDN1	NM_021101	17	1	na	na	39.3	42	1.07	-0.22	na	na
CLDN15	NM_014343	0	1	na	na	311.3	314	1.01	-1.3	na	na
CLDN23	NM_194284	2	0.5	na	na	11.5	9	0.78	-0.84	na	na
CLDN4	NM_001305	0	0	na	na	5.7	3	0.52	-1.25	na	na
CLDN7	NM_001185022	2	1	na	na	23	15	0.65	-1.55	na	na
CLDND2	NM_152353	3	0.5	na	na	14.4	17	1.18	0.25	na	na
CLEC12A	NM_001207010	0	0	na	na	11.5	20	1.74	1.07	na	na
CLEC2D	NM_001197318	1	0	na	na	558.4	648	1.16	-0.01	na	na
CLEC3B	NM_003278	0	0	na	na	2.9	9	3.13	1.79	na	na
CLEC4A	NM_016184	0	1	na	na	14.4	13	0.9	-0.56	na	na
CLEC4F	NM_173535	0	0	na	na	24.9	30	1.2	0.19	na	na
CLIC2	NM_001289	0	0	na	na	11.5	13	1.13	0.04	na	na
CLIC5	NM_001256023	1	0	na	na	2.9	2	0.7	-0.61	na	na
CLIP3	NM_015526	0	0	na	na	23	20	0.87	-0.85	na	na
CLMP	NM_024769	2	0.5	na	na	20.1	25	1.24	0.39	na	na
CLUL1	NM_199167	3	0	na	na	13.4	16	1.19	0.27	na	na
CLVS2	NM_001010852	9	0	na	na	18.2	31	1.7	1.48	na	na
CMKLR1	NM_001142345	0	0	na	na	1.9	3	1.57	0.46	na	na
CMTM1	NM_181296	0	0	na	na	10.5	10	0.95	-0.38	na	na
CMYA5	NM_153610	2	1	na	na	46	58	1.26	0.5	na	na
CNGA1	NM_001142564	2	0	na	na	7.7	5	0.65	-0.88	na	na
CNGA4	NM_001037329	0	0	na	na	8.6	7	0.81	-0.7	na	na
CNGB1	NM_001297	0	0	na	na	13.4	12	0.89	-0.59	na	na
CNIH2	NM_182553	4	0.5	na	na	105.4	98	0.93	-1.4	na	na
CNIH3	NM_152495	3	0.5	na	na	33.5	51	1.52	1.3	na	na
CNKSR1	NM_006314	1	0	na	na	38.3	30	0.78	-1.44	na	na
CNKSR2	NM_001168649	4	0	na	na	6.7	8	1.19	0.1	na	na
CNR1	NM_033181	0	0	na	na	4.8	4	0.84	-0.46	na	na
CNTN3	NM_020872	0	0	na	na	2.9	3	1.04	-0.08	na	na
CNTNAP3	NM_033655	1	0.5	na	na	8.6	2	0.23	-2.06	na	na
CNTNAP3B	NM_001201380	0	0	na	na	55.6	59	1.06	-0.37	na	na
COL11A2	NM_001163771	0	0	na	na	3.8	3	0.78	-0.56	na	na
COL16A1	NM_001856	0	0	na	na	4.8	4	0.84	-0.46	na	na
COL23A1	NM_173465	5	0.5	na	na	29.7	31	1.04	-0.35	na	na
COL28A1	NM_001037763	0	0	na	na	1.9	5	2.61	1.13	na	na
COL6A3	NM_057166	1	0.5	na	na	5.7	6	1.04	-0.07	na	na
COL6A5	NM_153264	0	0	na	na	15.3	7	0.46	-1.9	na	na
COL6A6	NM_001102608	1	0.5	na	na	1.9	4	2.09	0.84	na	na
COL7A1	NM_000094	1	0	na	na	49.8	58	1.16	0.1	na	na
COL9A1	NM_078485	2	0	na	na	2.9	2	0.7	-0.61	na	na
COL9A2	NM_001852	1	1	na	na	39.3	28	0.71	-1.79	na	na
COLEC11	NM_001255984	2	0.5	na	na	25.9	18	0.7	-1.63	na	na
COLQ	NM_005677	0	0	na	na	62.3	57	0.92	-1.11	na	na
CORIN	NM_006587	2	0	na	na	4.8	6	1.25	0.24	na	na
CORO2B	NM_001190456	7	0.5	na	na	31.6	32	1.01	-0.46	na	na
CORO6	NM_032854	9	1	na	na	76.6	83	1.08	-0.4	na	na
COX6B2	NM_144613	0	0	na	na	18.2	21	1.15	0.13	na	na
CP	NM_000096	0	0	na	na	1.9	2	1.04	-0.07	na	na
CPAMD8	NM_015692	1	1	na	na	8.6	8	0.93	-0.44	na	na
CPED1	NM_001105533	3	0	na	na	1.9	5	2.61	1.13	na	na
CPLX2	NM_001008220	0	0	na	na	1.9	5	2.61	1.13	na	na
CPNE4	NM_130808	1	0	na	na	1.9	2	1.04	-0.07	na	na
CPNE5	NM_020939	1	0.5	na	na	1.9	10	5.22	2.05	na	na
CPNE9	NM_153635	4	1	na	na	3.8	6	1.57	0.61	na	na
CPT1B	NM_004377	0	0	na	na	8.6	10	1.16	0.1	na	na
CR1	NM_000573	0	0	na	na	2.9	6	2.09	1.1	na	na
CR1L	NM_175710	3	0.5	na	na	3.8	12	3.13	1.8	na	na
CRB2	NM_173689	0	0.5	na	na	1.9	3	1.57	0.46	na	na
CRB3	NM_174881	1	0.5	na	na	8.6	7	0.81	-0.7	na	na
CREG2	NM_153836	3	0.5	na	na	18.2	25	1.37	0.74	na	na
CRHR1	NM_001145148	2	0	na	na	10.5	16	1.52	0.74	na	na
CRIP2	NM_001270841	6	0.5	na	na	44.1	41	0.93	-0.82	na	na
CRIPAK	NM_175918	0	0	na	na	165.7	170	1.03	-0.75	na	na
CRLF1	NM_004750	8	0.5	na	na	32.6	34	1.04	-0.35	na	na
CRTAC1	NM_001206528	8	0.5	na	na	13.4	16	1.19	0.27	na	na
CRYBA2	NM_057094	0	0	na	na	1.9	3	1.57	0.46	na	na
CRYBB2	NM_000496	0	0	na	na	17.2	18	1.04	-0.13	na	na
CRYBB3	NM_004076	0	0	na	na	7.7	10	1.3	0.28	na	na
CRYGS	NM_017541	0	0	na	na	8.6	5	0.58	-1.08	na	na
CSDC2	NM_014460	0	1.5	na	na	13.4	7	0.52	-1.62	na	na
CSF2RA	NM_001161530	1	0.5	na	na	7.7	8	1.04	-0.18	na	na
CSMD1	NM_033225	0	0	na	na	3.8	3	0.78	-0.56	na	na
CSMD3	NM_052900	0	0	na	na	3.8	3	0.78	-0.56	na	na
CSNK1A1L	NM_145203	0	0	na	na	2.9	6	2.09	1.1	na	na
CSRP1	NM_001193572	1	0.5	na	na	20.1	30	1.49	1.02	na	na
CSTA	NM_005213	0	0	na	na	3.8	3	0.78	-0.56	na	na
CTCFL	NM_001269043	1	0	na	na	5.7	3	0.52	-1.25	na	na
CTNNA3	NM_001127384	0	0	na	na	3.8	2	0.52	-0.99	na	na
CTNND2	NM_001332	0	0	na	na	6.7	3	0.45	-1.52	na	na
CTRL	NM_001907	5	0.5	na	na	49.8	38	0.76	-1.67	na	na
CTSK	NM_000396	1	0	na	na	33.5	54	1.61	1.54	na	na
CTSS	NM_001199739	0	0	na	na	10.5	25	2.37	1.81	na	na
CUBN	NM_001081	0	0	na	na	30.7	27	0.88	-0.99	na	na
CXCL3	NM_002090	0	0	na	na	26.8	31	1.16	0.04	na	na
CXCR7	NM_020311	0	0	na	na	6.7	16	2.39	1.53	na	na
CXorf36	NM_024689	0	0	na	na	3.8	3	0.78	-0.56	na	na
CXorf40A	NM_001171908	0	0	na	na	33.5	26	0.78	-1.47	na	na
CXorf40B	NM_001013845	6	1	na	na	252.9	318	1.26	0.7	na	na
CXorf48	NM_001031705	1	0	na	na	20.1	25	1.24	0.39	na	na
CXorf58	NM_001169574	0	1.5	na	na	6.7	12	1.79	0.94	na	na
CYBB	NM_000397	0	0	na	na	14.4	12	0.84	-0.8	na	na
CYBRD1	NM_024843	22	1	na	na	120.7	181	1.5	1.74	na	na
CYP24A1	NM_001128915	0	0	na	na	1.9	3	1.57	0.46	na	na
CYP27B1	NM_000785	1	0	na	na	166.7	164	0.98	-1.05	na	na
CYP2C18	NM_001128925	0	0	na	na	1.9	2	1.04	-0.07	na	na
CYP2E1	NM_000773	0	0	na	na	19.2	18	0.94	-0.58	na	na
CYP2W1	NM_017781	0	0	na	na	13.4	9	0.67	-1.21	na	na
CYP46A1	NM_006668	0	0	na	na	2.9	5	1.74	0.79	na	na
CYP4X1	NM_178033	3	0	na	na	3.8	7	1.83	0.87	na	na
CYS1	NM_001037160	0	0	na	na	29.7	26	0.88	-1.01	na	na
DAB1	NM_021080	0	0	na	na	7.7	7	0.91	-0.46	na	na
DAND5	NM_152654	0	0	na	na	18.2	12	0.66	-1.25	na	na
DAPK2	NM_014326	7	0	na	na	31.6	29	0.92	-0.84	na	na
DBNDD2	NM_018478	1	0.5	na	na	20.1	18	0.89	-0.75	na	na
DBX2	NM_001004329	3	0	na	na	3.8	4	1.04	-0.08	na	na
DCAF4L1	NM_001029955	0	0	na	na	35.4	35	0.99	-0.56	na	na
DCAF8L1	NM_001017930	1	0	na	na	1.9	3	1.57	0.46	na	na
DCDC1	NM_181807	1	0	na	na	17.2	17	0.99	-0.3	na	na
DCDC5	NM_020869	1	0	na	na	17.2	13	0.75	-1.11	na	na
DCST2	NM_144622	0	0	na	na	4.8	5	1.04	-0.07	na	na
DCT	NM_001922	0	0	na	na	3.8	3	0.78	-0.56	na	na
DDR2	NM_006182	3	0	na	na	31.6	34	1.08	-0.24	na	na
DDTL	NM_001084393	15	0.5	na	na	197.3	218	1.1	-0.35	na	na
DDX25	NM_013264	2	0	na	na	12.5	10	0.8	-0.78	na	na
DDX3Y	NM_004660	0	0	na	na	2.9	13	4.52	2.41	na	na
DES	NM_001927	1	1	na	na	2.9	6	2.09	1.1	na	na
DFNB59	NM_001042702	4	0.5	na	na	60.3	65	1.08	-0.35	na	na
DGKB	NM_004080	0	0	na	na	4.8	7	1.46	0.5	na	na
DGKG	NM_001080745	1	0.5	na	na	2.9	2	0.7	-0.61	na	na
DGKK	NM_001013742	0	0.5	na	na	2.9	3	1.04	-0.08	na	na
DHRS4L1	NM_001082488	0	0	na	na	1.9	3	1.57	0.46	na	na
DHRS4L2	NM_198083	0	0	na	na	6.7	6	0.89	-0.5	na	na
DHX58	NM_024119	1	0	na	na	18.2	7	0.38	-2.25	na	na
DIO3	NM_001362	5	0	na	na	9.6	16	1.67	0.97	na	na
DIRAS3	NM_004675	8	1	na	na	12.5	18	1.45	0.85	na	na
DISC1	NM_001164539	2	0	na	na	7.7	9	1.17	0.06	na	na
DKK2	NM_014421	2	1	na	na	19.2	14	0.73	-1.2	na	na
DKK3	NM_001018057	7	1	na	na	34.5	60	1.74	1.87	na	na
DLEC1	NM_007337	1	0	na	na	5.7	3	0.52	-1.25	na	na
DLG4	NM_001128827	2	0.5	na	na	92	103	1.12	-0.2	na	na
DLGAP3	NM_001080418	3	1	na	na	22	30	1.36	0.71	na	na
DLK1	NM_003836	1	0	na	na	1.9	27	14.09	3.35	na	na
DLX4	NM_001934	3	0	na	na	168.6	165	0.98	-1.09	na	na
DMGDH	NM_013391	0	0	na	na	6.7	11	1.64	0.76	na	na
DNAAF1	NM_178452	1	0	na	na	4.8	9	1.88	0.93	na	na
DNAH10	NM_207437	3	0	na	na	15.3	9	0.59	-1.53	na	na
DNAH12	NM_178504	0	0	na	na	1.9	4	2.09	0.84	na	na
DNAH17	NM_173628	0	0.5	na	na	5.7	5	0.87	-0.39	na	na
DNAH2	NM_020877	0	0.5	na	na	11.5	8	0.7	-1.02	na	na
DNAH3	NM_017539	2	0	na	na	8.6	4	0.46	-1.46	na	na
DNAH5	NM_001369	3	0	na	na	8.6	10	1.16	0.1	na	na
DNAH7	NM_018897	5	1	na	na	18.2	27	1.48	1	na	na
DNAH8	NM_001206927	0	0	na	na	12.5	6	0.48	-1.78	na	na
DNAI1	NM_012144	1	0	na	na	3.8	4	1.04	-0.08	na	na
DNAJB13	NM_153614	1	0	na	na	9.6	8	0.84	-0.69	na	na
DNAJC15	NM_013238	0	0.5	na	na	29.7	29	0.98	-0.6	na	na
DNAJC22	NM_024902	4	1	na	na	61.3	66	1.08	-0.35	na	na
DNAJC27	NM_001198559	1	1	na	na	287.4	341	1.19	0.23	na	na
DNAJC5G	NM_173650	0	0	na	na	9.6	7	0.73	-0.92	na	na
DNALI1	NM_003462	2	0	na	na	6.7	2	0.3	-1.72	na	na
DNASE1	NM_005223	0	0.5	na	na	152.3	149	0.98	-1.09	na	na
DNASE1L2	NM_001374	0	0	na	na	14.4	18	1.25	0.42	na	na
DND1	NM_194249	0	0	na	na	15.3	13	0.85	-0.75	na	na
DNER	NM_139072	1	0	na	na	1.9	6	3.13	1.37	na	na
DNHD1	NM_173589	0	0	na	na	48.9	66	1.35	0.84	na	na
DOC2B	NM_003585	3	0	na	na	2.9	12	4.18	2.28	na	na
DOK3	NM_024872	0	1	na	na	64.2	72	1.12	-0.12	na	na
DOK6	NM_152721	0	1	na	na	7.7	10	1.3	0.28	na	na
DOK7	NM_173660	0	0	na	na	12.5	15	1.2	0.3	na	na
DPEP1	NM_001128141	6	0.5	na	na	13.4	7	0.52	-1.62	na	na
DPP6	NM_001936	0	0	na	na	1.9	8	4.18	1.75	na	na
DPP7	NM_013379	0	0	na	na	72.8	96	1.32	0.8	na	na
DPPA4	NM_018189	0	0	na	na	9.6	14	1.46	0.65	na	na
DPY19L2	NM_173812	0	0	na	na	9.6	9	0.94	-0.41	na	na
DPYD	NM_000110	4	0.5	na	na	2.9	5	1.74	0.79	na	na
DPYS	NM_001385	0	0	na	na	3.8	7	1.83	0.87	na	na
DRD2	NM_016574	0	0	na	na	3.8	2	0.52	-0.99	na	na
DRD4	NM_000797	0	0	na	na	5.7	6	1.04	-0.07	na	na
DRP2	NM_001939	0	0	na	na	67.1	57	0.85	-1.48	na	na
DSC1	NM_024421	0	0	na	na	7.7	7	0.91	-0.46	na	na
DSCR6	NM_018962	4	1	na	na	87.2	89	1.02	-0.77	na	na
DSEL	NM_032160	0	0	na	na	19.2	16	0.84	-0.8	na	na
DTHD1	NM_001170700	0	0	na	na	8.6	6	0.7	-1.02	na	na
DTX1	NM_004416	0	0	na	na	4.8	2	0.42	-1.28	na	na
DTX4	NM_015177	1	0	na	na	4.8	9	1.88	0.93	na	na
DUOX2	NM_014080	0	0	na	na	9.6	6	0.63	-1.24	na	na
DUOXA1	NM_001276265	0	0	na	na	1.9	4	2.09	0.84	na	na
DUSP10	NM_144729	6	0.5	na	na	25.9	40	1.55	1.14	na	na
DUSP23	NM_017823	7	1	na	na	14.4	12	0.84	-0.8	na	na
DUSP6	NM_022652	0	1	na	na	12.5	27	2.17	2.08	na	na
DYX1C1	NM_130810	4	0	na	na	24.9	22	0.88	-0.8	na	na
DZANK1	NM_001099407	19	1	na	na	100.6	131	1.3	0.8	na	na
EBF4	NM_001110514	7	1	na	na	130.3	140	1.07	-0.58	na	na
EBLN2	NM_018029	0	0	na	na	62.3	84	1.35	0.93	na	na
ECM1	NM_004425	2	0	na	na	15.3	15	0.98	-0.32	na	na
ECT2L	NM_001195037	0	0	na	na	3.8	6	1.57	0.61	na	na
EDA2R	NM_001242310	5	0	na	na	16.3	23	1.41	0.78	na	na
EDN1	NM_001168319	0	0.5	na	na	2.9	8	2.78	1.59	na	na
EFCAB12	NM_207307	0	0.5	na	na	34.5	39	1.13	0.02	na	na
EFCAB13	NM_001195192	0	0.5	na	na	13.4	9	0.67	-1.21	na	na
EFCAB3	NM_173503	6	1	na	na	36.4	46	1.26	0.5	na	na
EFCAB5	NM_198529	1	0.5	na	na	8.6	7	0.81	-0.7	na	na
EFCAB8	XM_003119820	0	0	na	na	3.8	3	0.78	-0.56	na	na
EFNA2	NM_001405	4	0.5	na	na	62.3	51	0.82	-1.67	na	na
EGF	NM_001178130	2	0.5	na	na	9.6	21	2.19	1.63	na	na
EGR2	NM_001136177	2	0.5	na	na	17.2	15	0.87	-0.68	na	na
EGR3	NM_001199881	2	0	na	na	12.5	21	1.69	1.32	na	na
EIF4A1	NM_001204510	1	0	na	na	67.1	73	1.09	-0.29	na	na
EIF4E1B	NM_001099408	0	0	na	na	1.9	7	3.65	1.58	na	na
ELF3	NM_004433	0	0	na	na	7.7	12	1.57	0.66	na	na
ELFN2	NM_052906	11	0.5	na	na	48.9	52	1.06	-0.35	na	na
ELMO3	NM_024712	0	0	na	na	36.4	42	1.15	0.11	na	na
EMILIN1	NM_007046	6	1	na	na	33.5	41	1.22	0.36	na	na
EMR2	NM_001271052	2	0	na	na	17.2	16	0.93	-0.48	na	na
ENDOU	NM_001172440	0	0	na	na	9.6	8	0.84	-0.69	na	na
ENG	NM_001114753	2	1	na	na	3.8	4	1.04	-0.08	na	na
ENHO	NM_198573	7	0	na	na	292.2	286	0.98	-1.58	na	na
ENKUR	NM_145010	0	0	na	na	7.7	10	1.3	0.28	na	na
ENPP3	NM_005021	0	0	na	na	11.5	20	1.74	1.07	na	na
ENTPD1	NM_001164181	0	1	na	na	69.9	64	0.92	-1.27	na	na
ENTPD2	NM_001246	1	0.5	na	na	5.7	10	1.74	0.88	na	na
ENTPD8	NM_198585	0	0	na	na	5.7	3	0.52	-1.25	na	na
EPDR1	NM_001242946	13	1	na	na	152.3	139	0.91	-1.72	na	na
EPHA6	NM_173655	5	0	na	na	18.2	21	1.15	0.13	na	na
EPHB6	NM_004445	3	0	na	na	8.6	22	2.55	1.99	na	na
EPS8L2	NM_022772	0	0	na	na	11.5	9	0.78	-0.84	na	na
ERBB3	NM_001005915	6	0.5	na	na	21.1	14	0.66	-1.49	na	na
ERCC5	NM_000123	1	1	na	na	47.9	49	1.02	-0.55	na	na
ERICH2	XM_001714892	2	0	na	na	13.4	11	0.82	-0.73	na	na
ERN2	NM_033266	0	0	na	na	7.7	12	1.57	0.66	na	na
ERV3-1	NM_001007253	5	0.5	na	na	67.1	77	1.15	0.01	na	na
ERVW-1	NM_001130925	0	0	na	na	39.3	49	1.25	0.44	na	na
ETS1	NM_001143820	5	0.5	na	na	22	24	1.09	-0.07	na	na
ETV2	NM_014209	2	0.5	na	na	7.7	6	0.78	-0.78	na	na
ETV4	NM_001261438	4	0	na	na	18.2	26	1.43	0.87	na	na
EVA1A	NM_032181	4	0	na	na	16.3	29	1.78	1.48	na	na
EVA1C	NM_058187	2	0	na	na	21.1	21	1	-0.38	na	na
EXD1	NM_152596	0	0	na	na	3.8	13	3.39	1.94	na	na
EXTL1	NM_004455	0	0	na	na	10.5	13	1.23	0.25	na	na
EYS	NM_198283	1	0	na	na	6.7	9	1.34	0.34	na	na
F3	NM_001178096	6	1	na	na	75.7	74	0.98	-0.89	na	na
F5	NM_000130	0	0	na	na	16.3	24	1.47	0.91	na	na
F8	NM_019863	2	1	na	na	6.7	17	2.54	1.66	na	na
F8A1	NM_012151	6	0	na	na	209.8	260	1.24	0.67	na	na
FAAH2	NM_174912	1	0	na	na	7.7	9	1.17	0.06	na	na
FABP3	NM_004102	0	0	na	na	7.7	4	0.52	-1.26	na	na
FAIM3	NM_001142473	0	0	na	na	7.7	6	0.78	-0.78	na	na
FAM110C	NM_001077710	7	0.5	na	na	34.5	34	0.99	-0.57	na	na
FAM110D	NM_024869	0	0	na	na	2.9	4	1.39	0.41	na	na
FAM111A	NM_198847	1	0	na	na	18.2	12	0.66	-1.25	na	na
FAM129C	NM_001098524	1	0.5	na	na	2.9	2	0.7	-0.61	na	na
FAM131B	NM_014690	2	0	na	na	30.7	25	0.82	-1.28	na	na
FAM132A	NM_001014980	2	0	na	na	2.9	5	1.74	0.79	na	na
FAM133A	NM_001171111	0	0.5	na	na	19.2	24	1.25	0.42	na	na
FAM133B	NM_152789	1	0	na	na	76.6	84	1.1	-0.33	na	na
FAM13C	NM_001166698	7	0	na	na	102.5	134	1.31	0.83	na	na
FAM154B	NM_001008226	2	0	na	na	44.1	43	0.98	-0.61	na	na
FAM159B	NM_001164442	11	0	na	na	24.9	43	1.73	1.55	na	na
FAM163A	NM_173509	3	0.5	na	na	21.1	32	1.52	1.08	na	na
FAM167A	NM_053279	4	0	na	na	49.8	52	1.04	-0.45	na	na
FAM167B	NM_032648	0	0	na	na	5.7	2	0.35	-1.52	na	na
FAM174B	NM_207446	9	0.5	na	na	38.3	63	1.64	1.63	na	na
FAM179A	NM_199280	4	0	na	na	16.3	24	1.47	0.91	na	na
FAM184B	NM_015688	1	0.5	na	na	17.2	20	1.16	0.19	na	na
FAM186B	NM_032130	3	0.5	na	na	5.7	10	1.74	0.88	na	na
FAM188B	NM_032222	0	0.5	na	na	10.5	7	0.66	-1.12	na	na
FAM189A1	NM_015307	3	0	na	na	101.5	112	1.1	-0.29	na	na
FAM194A	NM_152394	0	0	na	na	3.8	3	0.78	-0.56	na	na
FAM196A	NM_001039762	0	0	na	na	5.7	4	0.7	-0.77	na	na
FAM198B	NM_001128424	0	0	na	na	3.8	6	1.57	0.61	na	na
FAM19A2	NM_178539	0	0	na	na	5.7	4	0.7	-0.77	na	na
FAM19A3	NM_182759	0	0	na	na	1.9	4	2.09	0.84	na	na
FAM19A4	NM_001005527	1	0	na	na	6.7	7	1.04	-0.18	na	na
FAM212A	NM_203370	1	1	na	na	3.8	17	4.44	2.4	na	na
FAM214B	NM_025182	1	2	na	na	52.7	46	0.87	-1.35	na	na
FAM21A	NM_001005751	0	0.5	na	na	11.5	11	0.96	-0.36	na	na
FAM220A	NM_001037163	19	1	na	na	458.8	531	1.16	-0.03	na	na
FAM222A	NM_032829	25	0.5	na	na	129.3	155	1.2	0.18	na	na
FAM227A	NM_001013647	0	0.5	na	na	251.9	287	1.14	-0.18	na	na
FAM228A	NM_001040710	0	0	na	na	6.7	11	1.64	0.76	na	na
FAM228B	NM_001145710	3	0.5	na	na	46.9	64	1.36	0.89	na	na
FAM229A	NM_001167676	0	0	na	na	96.7	89	0.92	-1.41	na	na
FAM22A	NM_001099338	0	0	na	na	32.6	35	1.07	-0.24	na	na
FAM22D	NM_001009610	0	0	na	na	19.2	29	1.51	1.07	na	na
FAM24B	NM_001204364	0	0	na	na	15.3	13	0.85	-0.75	na	na
FAM45A	NM_207009	0	0.5	na	na	19.2	10	0.52	-1.81	na	na
FAM47E	NM_001242936	0	0	na	na	7.7	5	0.65	-0.88	na	na
FAM49A	NM_030797	2	0	na	na	14.4	13	0.9	-0.56	na	na
FAM57B	NM_031478	0	0	na	na	8.6	12	1.39	0.54	na	na
FAM65B	NM_015864	1	1	na	na	48.9	64	1.31	0.69	na	na
FAM69C	NM_001044369	0	0.5	na	na	3.8	7	1.83	0.87	na	na
FAM71F2	NM_001128926	0	0	na	na	7.7	4	0.52	-1.26	na	na
FAM72A	NM_001123168	0	0	na	na	25.9	29	1.12	-0.08	na	na
FAM72B	NM_001100910	0	0	na	na	13.4	13	0.97	-0.35	na	na
FAM72C	XM_003846500	0	0	na	na	2.9	3	1.04	-0.08	na	na
FAM78B	NM_001017961	0	0.5	na	na	9.6	8	0.84	-0.69	na	na
FAM81A	NM_152450	5	0.5	na	na	136	157	1.15	-0.09	na	na
FAM83E	NM_017708	0	0	na	na	7.7	14	1.83	0.98	na	na
FAM84A	NM_145175	1	0	na	na	11.5	6	0.52	-1.62	na	na
FAM86C1	NM_152563	4	1	na	na	18.2	23	1.26	0.45	na	na
FANCF	NM_022725	2	0	na	na	12.5	16	1.28	0.5	na	na
FANK1	NM_145235	3	0	na	na	7.7	10	1.3	0.28	na	na
FBLN7	NM_001128165	0	0	na	na	12.5	21	1.69	1.32	na	na
FBN3	NM_032447	6	0	na	na	22	9	0.41	-2.4	na	na
FBP1	NM_001127628	0	0.5	na	na	4.8	7	1.46	0.5	na	na
FBXL13	NM_001111038	0	0	na	na	11.5	13	1.13	0.04	na	na
FBXL21	NM_012159	3	1	na	na	94.8	109	1.15	-0.04	na	na
FBXL22	NM_203373	0	0	na	na	15.3	16	1.04	-0.13	na	na
FBXL7	NM_012304	0	1	na	na	8.6	5	0.58	-1.08	na	na
FBXO15	NM_001142958	2	0.5	na	na	3.8	7	1.83	0.87	na	na
FBXO24	NM_033506	3	0.5	na	na	20.1	22	1.09	-0.06	na	na
FBXO43	NM_001029860	1	0	na	na	5.7	8	1.39	0.42	na	na
FBXO48	NM_001024680	5	1	na	na	122.6	177	1.44	1.47	na	na
FBXW10	NM_001267586	0	0	na	na	2.9	3	1.04	-0.08	na	na
FBXW12	NM_001159927	2	1	na	na	7.7	11	1.44	0.48	na	na
FBXW7	NM_001257069	3	0	na	na	76.6	79	1.03	-0.71	na	na
FCER1G	NM_004106	1	0.5	na	na	1.9	8	4.18	1.75	na	na
FCGBP	NM_003890	1	0	na	na	4.8	4	0.84	-0.46	na	na
FCRL1	NM_001159397	0	0	na	na	23	19	0.83	-1.03	na	na
FERMT3	NM_031471	0	0	na	na	5.7	8	1.39	0.42	na	na
FEV	NM_017521	1	0	na	na	1.9	7	3.65	1.58	na	na
FEZ1	NM_022549	1	0.5	na	na	89.1	88	0.99	-0.97	na	na
FGD5	NM_152536	2	0	na	na	3.8	7	1.83	0.87	na	na
FGF13	NM_033642	3	0	na	na	7.7	9	1.17	0.06	na	na
FGF17	NM_003867	0	0	na	na	4.8	3	0.63	-0.94	na	na
FGF18	NM_003862	0	0	na	na	4.8	10	2.09	1.11	na	na
FGF19	NM_005117	1	0	na	na	14.4	6	0.42	-2.08	na	na
FGF20	NM_019851	1	0	na	na	1.9	3	1.57	0.46	na	na
FGF21	NM_019113	1	0	na	na	1.9	3	1.57	0.46	na	na
FGF3	NM_005247	0	0	na	na	1.9	4	2.09	0.84	na	na
FGF5	NM_033143	0	0.5	na	na	103.5	123	1.19	0.2	na	na
FGF8	NM_033165	0	0	na	na	4.8	8	1.67	0.73	na	na
FGF9	NM_002010	11	1	na	na	201.2	218	1.08	-0.51	na	na
FGFBP1	NM_005130	3	0	na	na	4.8	7	1.46	0.5	na	na
FGG	NM_000509	2	0	na	na	1.9	2	1.04	-0.07	na	na
FGL2	NM_006682	0	0	na	na	7.7	8	1.04	-0.18	na	na
FHAD1	NM_052929	6	0	na	na	30.7	34	1.11	-0.12	na	na
FIBIN	NM_203371	2	1	na	na	29.7	33	1.11	-0.11	na	na
FIGNL2	NM_001013690	0	0	na	na	17.2	10	0.58	-1.56	na	na
FILIP1	NM_015687	0	1	na	na	7.7	11	1.44	0.48	na	na
FILIP1L	NM_014890	4	0.5	na	na	9.6	16	1.67	0.97	na	na
FKBP11	NM_016594	0	0.5	na	na	62.3	51	0.82	-1.67	na	na
FLI1	NM_001271012	4	1	na	na	19.2	25	1.3	0.56	na	na
FLJ27352	NM_001198784	4	0	na	na	34.5	36	1.04	-0.32	na	na
FLJ44313	NM_001272093	2	1	na	na	12.5	15	1.2	0.3	na	na
FLJ44635	NM_207422	0	0	na	na	100.6	132	1.31	0.85	na	na
FLJ45513	NM_001242791	0	0	na	na	5.7	5	0.87	-0.39	na	na
FLT3	NM_004119	3	1	na	na	11.5	20	1.74	1.07	na	na
FMN1	NM_001103184	4	0	na	na	11.5	13	1.13	0.04	na	na
FMNL1	NM_005892	6	0	na	na	41.2	53	1.29	0.58	na	na
FMO2	NM_001460	0	0	na	na	3.8	4	1.04	-0.08	na	na
FMOD	NM_002023	0	0	na	na	6.7	3	0.45	-1.52	na	na
FN3K	NM_022158	0	0	na	na	8.6	10	1.16	0.1	na	na
FNDC4	NM_022823	5	0.5	na	na	227	222	0.98	-1.49	na	na
FNDC5	NM_001171940	1	0.5	na	na	30.7	52	1.7	1.49	na	na
FOLH1	NM_001014986	3	0	na	na	2.9	3	1.04	-0.08	na	na
FOLR1	NM_000802	1	0	na	na	1.9	7	3.65	1.58	na	na
FOSL1	NM_005438	9	0.5	na	na	23.9	25	1.04	-0.22	na	na
FOXA3	NM_004497	7	1	na	na	24.9	29	1.16	0.06	na	na
FOXB2	NM_001013735	1	0.5	na	na	3.8	4	1.04	-0.08	na	na
FOXH1	NM_003923	1	0	na	na	13.4	9	0.67	-1.21	na	na
FOXJ1	NM_001454	0	0	na	na	5.7	8	1.39	0.42	na	na
FOXL1	NM_005250	1	2	na	na	36.4	35	0.96	-0.68	na	na
FOXP1	NM_001012505	4	1	na	na	30.7	26	0.85	-1.13	na	na
FOXP3	NM_001114377	0	0	na	na	24.9	19	0.76	-1.31	na	na
FREM1	NM_144966	4	0	na	na	20.1	10	0.5	-1.93	na	na
FRMD3	NM_001244962	1	0	na	na	4.8	2	0.42	-1.28	na	na
FRMPD3	XM_003846769	0	0	na	na	4.8	5	1.04	-0.07	na	na
FRMPD4	NM_014728	0	0	na	na	7.7	6	0.78	-0.78	na	na
FRRS1L	NM_014334	4	0.5	na	na	22	33	1.5	1.04	na	na
FRZB	NM_001463	0	1	na	na	8.6	8	0.93	-0.44	na	na
FSCN2	NM_012418	0	0	na	na	2.9	4	1.39	0.41	na	na
FSD1L	NM_031919	2	1	na	na	22	16	0.73	-1.22	na	na
FSD2	NM_001007122	0	0	na	na	3.8	2	0.52	-0.99	na	na
FSIP1	NM_152597	7	1	na	na	22	31	1.41	0.82	na	na
FSIP2	NM_173651	0	0	na	na	22	30	1.36	0.71	na	na
FST	NM_013409	0	0.5	na	na	7.7	13	1.7	0.83	na	na
FSTL4	NM_015082	5	1	na	na	11.5	17	1.48	0.68	na	na
FTCD	NM_206965	0	0.5	na	na	2.9	4	1.39	0.41	na	na
FUT1	NM_000148	0	0	na	na	23.9	37	1.55	1.13	na	na
FUT5	NM_002034	0	0	na	na	1.9	3	1.57	0.46	na	na
FUT9	NM_006581	1	0.5	na	na	55.6	72	1.3	0.63	na	na
FXYD1	NM_005031	1	1	na	na	3.8	7	1.83	0.87	na	na
FXYD6	NM_001164831	0	0	na	na	183	203	1.11	-0.31	na	na
G0S2	NM_015714	8	1	na	na	30.7	41	1.34	0.59	na	na
GAB3	NM_080612	0	0	na	na	13.4	26	1.94	1.74	na	na
GABRA4	NM_001204267	0	0	na	na	9.6	10	1.04	-0.15	na	na
GABRG2	NM_198903	0	0	na	na	1.9	2	1.04	-0.07	na	na
GABRQ	NM_018558	1	0	na	na	3.8	6	1.57	0.61	na	na
GABRR2	NM_002043	0	0	na	na	3.8	10	2.61	1.49	na	na
GADD45G	NM_006705	4	0.5	na	na	8.6	10	1.16	0.1	na	na
GAGE1	NM_001468	0	0	na	na	3.8	4	1.04	-0.08	na	na
GAL3ST2	NM_022134	0	0.5	na	na	5.7	5	0.87	-0.39	na	na
GAL3ST4	NM_024637	0	0	na	na	20.1	13	0.65	-1.57	na	na
GALNT14	NM_024572	1	0.5	na	na	3.8	6	1.57	0.61	na	na
GALNT15	NM_054110	0	0	na	na	14.4	13	0.9	-0.56	na	na
GALNT8	NM_017417	0	0.5	na	na	3.8	4	1.04	-0.08	na	na
GALNTL5	NM_145292	0	0	na	na	5.7	3	0.52	-1.25	na	na
GALNTL6	NM_001034845	2	1	na	na	34.5	44	1.28	0.54	na	na
GALR2	NM_003857	9	0.5	na	na	2.9	5	1.74	0.79	na	na
GAS2L1	NM_152236	8	1	na	na	91	66	0.73	-2.58	na	na
GAS2L2	NM_139285	0	0	na	na	2.9	4	1.39	0.41	na	na
GAS6	NM_001143946	11	0.5	na	na	153.3	150	0.98	-1.09	na	na
GATM	NM_001482	1	0	na	na	11.5	14	1.22	0.22	na	na
GATS	NM_178831	1	1	na	na	46.9	61	1.3	0.65	na	na
GCM1	NM_003643	0	0	na	na	16.3	17	1.04	-0.13	na	na
GCM2	NM_004752	0	0	na	na	4.8	2	0.42	-1.28	na	na
GCNT2	NM_145649	4	0.5	na	na	39.3	58	1.48	1.17	na	na
GCNT4	NM_016591	1	0	na	na	5.7	11	1.91	1.08	na	na
GDAP1L1	NM_001256740	1	0	na	na	4.8	6	1.25	0.24	na	na
GDF10	NM_004962	6	0.5	na	na	7.7	13	1.7	0.83	na	na
GDF9	NM_005260	1	0	na	na	23.9	37	1.55	1.13	na	na
GDNF	NM_000514	0	0	na	na	34.5	38	1.1	-0.09	na	na
GDPD2	NM_001171192	0	0	na	na	2.9	3	1.04	-0.08	na	na
GDPD3	NM_024307	6	1	na	na	25.9	17	0.66	-1.52	na	na
GFAP	NM_001131019	0	0	na	na	4.8	5	1.04	-0.07	na	na
GFRA2	NM_001165039	2	0.5	na	na	3.8	3	0.78	-0.56	na	na
GFRA3	NM_001496	2	0	na	na	6.7	11	1.64	0.76	na	na
GGN	NM_152657	0	0.5	na	na	2.9	5	1.74	0.79	na	na
GGT1	NM_001032364	1	0	na	na	1.9	7	3.65	1.58	na	na
GIPC2	NM_017655	0	0.5	na	na	3.8	9	2.35	1.31	na	na
GJB7	NM_198568	0	0	na	na	17.2	12	0.7	-1.35	na	na
GJC2	NM_020435	1	1	na	na	25.9	27	1.04	-0.35	na	na
GJC3	NM_181538	0	1.5	na	na	2.9	3	1.04	-0.08	na	na
GJD3	NM_152219	1	0	na	na	4.8	5	1.04	-0.07	na	na
GJD4	NM_153368	0	0	na	na	7.7	6	0.78	-0.78	na	na
GLB1L3	NM_001080407	5	1	na	na	50.8	48	0.95	-0.95	na	na
GLDN	NM_181789	0	1	na	na	26.8	27	1.01	-0.49	na	na
GLIPR1	NM_006851	0	0	na	na	2.9	5	1.74	0.79	na	na
GLIPR1L2	NM_152436	0	0	na	na	27.8	35	1.26	0.36	na	na
GLIS1	NM_147193	3	0.5	na	na	12.5	19	1.53	1.02	na	na
GLRA3	NM_001042543	0	1	na	na	2.9	6	2.09	1.1	na	na
GLT1D1	NM_144669	0	0	na	na	1.9	4	2.09	0.84	na	na
GLUD2	NM_012084	2	0	na	na	3.8	3	0.78	-0.56	na	na
GMFG	NM_004877	0	0.5	na	na	2.9	7	2.44	1.36	na	na
GNA14	NM_004297	0	0	na	na	1.9	5	2.61	1.13	na	na
GNA15	NM_002068	0	0	na	na	2.9	2	0.7	-0.61	na	na
GNAT1	NM_000172	0	0	na	na	11.5	19	1.65	0.95	na	na
GNAT2	NM_005272	2	0	na	na	3.8	6	1.57	0.61	na	na
GNB3	NM_002075	1	0	na	na	71.8	74	1.03	-0.6	na	na
GNG2	NM_001243774	9	1	na	na	104.4	108	1.03	-0.71	na	na
GNG4	NM_004485	20	0	na	na	901.4	916	1.02	-1.6	na	na
GNGT1	NM_021955	1	0	na	na	33.5	23	0.69	-1.68	na	na
GNMT	NM_018960	3	1	na	na	4.8	15	3.13	1.8	na	na
GNRH1	NM_001083111	0	0	na	na	22	17	0.77	-1.04	na	na
GOLGA6L9	NM_198181	0	0	na	na	4.8	3	0.63	-0.94	na	na
GOLGA7B	NM_001010917	0	0	na	na	10.5	17	1.61	0.89	na	na
GOLGA8A	NM_181077	0	0	na	na	117.8	123	1.04	-0.65	na	na
GP2	NM_001007242	0	0	na	na	3.8	5	1.3	0.3	na	na
GP6	NM_001083899	1	0	na	na	3.8	6	1.57	0.61	na	na
GPA33	NM_005814	0	0	na	na	2.9	3	1.04	-0.08	na	na
GPD1	NM_001257199	1	0	na	na	7.7	4	0.52	-1.26	na	na
GPER	NM_001098201	0	3.5	na	na	35.4	27	0.76	-1.54	na	na
GPHA2	NM_130769	2	0	na	na	5.7	6	1.04	-0.07	na	na
GPNMB	NM_002510	1	0	na	na	19.2	27	1.41	0.82	na	na
GPR1	NM_001261455	4	0.5	na	na	11.5	24	2.09	1.51	na	na
GPR113	NM_001145168	0	0.5	na	na	4.8	6	1.25	0.24	na	na
GPR115	NM_153838	0	0	na	na	2.9	2	0.7	-0.61	na	na
GPR116	NM_015234	2	0	na	na	10.5	4	0.38	-1.8	na	na
GPR12	NM_005288	0	0.5	na	na	13.4	14	1.04	-0.13	na	na
GPR128	NM_032787	0	0	na	na	3.8	2	0.52	-0.99	na	na
GPR133	NM_198827	1	0	na	na	4.8	5	1.04	-0.07	na	na
GPR135	NM_022571	0	0	na	na	26.8	18	0.67	-1.75	na	na
GPR144	NM_001161808	1	1.5	na	na	3.8	2	0.52	-0.99	na	na
GPR146	NM_138445	5	0.5	na	na	9.6	15	1.57	0.82	na	na
GPR156	NM_001168271	4	0	na	na	24.9	31	1.24	0.32	na	na
GPR158	NM_020752	0	0	na	na	10.5	4	0.38	-1.8	na	na
GPR160	NM_014373	13	1	na	na	595.8	655	1.1	-0.65	na	na
GPR162	NM_019858	2	0	na	na	26.8	36	1.34	0.6	na	na
GPR176	NM_001271855	5	0.5	na	na	196.4	205	1.04	-0.81	na	na
GPR19	NM_006143	4	0.5	na	na	6.7	13	1.94	1.1	na	na
GPR35	NM_005301	0	0	na	na	7.7	3	0.39	-1.74	na	na
GPR45	NM_007227	5	0.5	na	na	6.7	8	1.19	0.1	na	na
GPR56	NM_001145770	0	0.5	na	na	2.9	2	0.7	-0.61	na	na
GPR75	NM_006794	1	0.5	na	na	68	82	1.21	0.29	na	na
GPR83	NM_016540	0	0	na	na	11.5	16	1.39	0.54	na	na
GPR85	NM_001146267	8	0.5	na	na	55.6	62	1.12	-0.12	na	na
GPR88	NM_022049	1	0	na	na	10.5	13	1.23	0.25	na	na
GPR97	NM_170776	0	0	na	na	3.8	4	1.04	-0.08	na	na
GPRASP1	NM_001099411	2	0	na	na	24.9	31	1.24	0.32	na	na
GPSM3	NM_022107	0	0	na	na	14.4	4	0.28	-2.34	na	na
GRASP	NM_001271856	1	0	na	na	26.8	31	1.16	0.04	na	na
GRB7	NM_001030002	0	0	na	na	4.8	9	1.88	0.93	na	na
GREM2	NM_022469	1	0	na	na	16.3	15	0.92	-0.51	na	na
GRIA2	NM_001083620	0	0	na	na	2.9	6	2.09	1.1	na	na
GRIK2	NM_021956	0	0	na	na	4.8	8	1.67	0.73	na	na
GRIK4	NM_014619	5	1	na	na	24.9	31	1.24	0.32	na	na
GRIK5	NM_002088	0	0	na	na	35.4	43	1.21	0.32	na	na
GRIN1	NM_007327	1	0	na	na	9.6	8	0.84	-0.69	na	na
GRIN2C	NM_000835	0	0	na	na	20.1	3	0.15	-3.38	na	na
GRIN3B	XM_003403700	4	0	na	na	4.8	2	0.42	-1.28	na	na
GRIP2	NM_001080423	8	0.5	na	na	60.3	56	0.93	-1.04	na	na
GRK4	NM_182982	5	0	na	na	103.5	120	1.16	0.04	na	na
GRK5	NM_005308	25	1	na	na	202.1	236	1.17	0.1	na	na
GRM2	NM_000839	1	0	na	na	6.7	7	1.04	-0.18	na	na
GRM3	NM_000840	0	0	na	na	1.9	3	1.57	0.46	na	na
GRM4	NM_001256809	2	0	na	na	9.6	8	0.84	-0.69	na	na
GRM8	NM_000845	0	0	na	na	4.8	7	1.46	0.5	na	na
GRPR	NM_005314	0	0	na	na	2.9	3	1.04	-0.08	na	na
GSDMA	NM_178171	0	0	na	na	3.8	3	0.78	-0.56	na	na
GSDMB	NM_001165958	0	0	na	na	44.1	42	0.95	-0.71	na	na
GSG1L	NM_001109763	0	0.5	na	na	7.7	10	1.3	0.28	na	na
GTF2H2	NM_001515	1	0.5	na	na	1.9	2	1.04	-0.07	na	na
GTF2H2D	NM_001042490	0	0	na	na	61.3	54	0.88	-1.3	na	na
GUCA1B	NM_002098	0	0	na	na	34.5	33	0.96	-0.68	na	na
GUCY1A2	NM_001256424	6	1	na	na	88.1	86	0.98	-1.05	na	na
GUCY2C	NM_004963	0	0	na	na	2.9	2	0.7	-0.61	na	na
GYS2	NM_021957	0	0	na	na	7.7	12	1.57	0.66	na	na
HAAO	NM_012205	11	0.5	na	na	10.5	16	1.52	0.74	na	na
HAL	NM_002108	0	0	na	na	11.5	20	1.74	1.07	na	na
HAPLN2	NM_021817	0	0.5	na	na	17.2	12	0.7	-1.35	na	na
HAPLN4	NM_023002	0	0	na	na	14.4	12	0.84	-0.8	na	na
HAS2	NM_005328	2	0	na	na	13.4	19	1.42	0.79	na	na
HBEGF	NM_001945	9	1	na	na	93.9	115	1.23	0.36	na	na
HBZ	NM_005332	0	0	na	na	7.7	3	0.39	-1.74	na	na
HCLS1	NM_005335	1	0	na	na	4.8	7	1.46	0.5	na	na
HCN4	NM_005477	9	0.5	na	na	33.5	21	0.63	-1.99	na	na
HCRTR2	NM_001526	0	0	na	na	2.9	2	0.7	-0.61	na	na
HCST	NM_014266	1	0	na	na	3.8	2	0.52	-0.99	na	na
HDAC9	NM_178425	7	0	na	na	18.2	21	1.15	0.13	na	na
HECTD2	NM_173497	20	1	na	na	136	175	1.29	0.67	na	na
HELT	NM_001029887	4	0	na	na	2.9	3	1.04	-0.08	na	na
HEPACAM	NM_152722	0	0	na	na	2.9	3	1.04	-0.08	na	na
HEPHL1	NM_001098672	0	0	na	na	5.7	3	0.52	-1.25	na	na
HESX1	NM_003865	1	0	na	na	62.3	87	1.4	1.12	na	na
HHIPL2	NM_024746	0	0	na	na	19.2	13	0.68	-1.43	na	na
HIF3A	NM_152796	0	0	na	na	4.8	4	0.84	-0.46	na	na
HIPK4	NM_144685	0	0	na	na	2.9	4	1.39	0.41	na	na
HIST1H2AD	NM_021065	172	11.5	0.07	-2.57	1	4	na	na	na	na
HIST1H2BN	NM_003520	181	42.4	0.23	0.41	1	6	na	na	na	na
HIST1H3D	NM_003530	19	4	0.21	-0.31	1	2	na	na	na	na
HIST2H2AB	NM_175065	808	117.4	0.15	-1.69	2.9	1	na	na	na	na
HK3	NM_002115	0	0	na	na	3.8	5	1.3	0.3	na	na
HLA-DOB	NM_002120	1	0.5	na	na	28.7	41	1.43	0.83	na	na
HLA-DPB1	NM_002121	6	0.5	na	na	20.1	20	0.99	-0.39	na	na
HLA-DRA	NM_019111	2	0.5	na	na	2.9	13	4.52	2.41	na	na
HLA-DRB5	NM_002125	0	0	na	na	2.9	2	0.7	-0.61	na	na
HMSD	NM_001123366	0	0	na	na	2.9	4	1.39	0.41	na	na
HMX3	NM_001105574	6	1	na	na	3.8	5	1.3	0.3	na	na
HNF4G	NM_004133	7	1	na	na	54.6	60	1.1	-0.19	na	na
HNRNPA1L2	NM_001011725	3	0.5	na	na	90	121	1.34	0.93	na	na
HOGA1	NM_138413	10	0.5	na	na	29.7	28	0.94	-0.73	na	na
HORMAD1	NM_032132	0	0	na	na	3.8	2	0.52	-0.99	na	na
HOXA2	NM_006735	1	0	na	na	101.5	90	0.89	-1.64	na	na
HOXB5	NM_002147	2	0	na	na	200.2	203	1.01	-1.05	na	na
HOXC5	NM_018953	2	1	na	na	69.9	56	0.8	-1.78	na	na
HOXD1	NM_024501	8	0.5	na	na	27.8	21	0.76	-1.34	na	na
HOXD4	NM_014621	4	0.5	na	na	258.6	166	0.64	-4.11	na	na
HOXD8	NM_001199747	3	1	na	na	168.6	194	1.15	0.07	na	na
HOXD9	NM_014213	1	0.5	na	na	207.9	198	0.95	-1.56	na	na
HP11026	XM_003846647	0	0	na	na	1.9	3	1.57	0.46	na	na
HPCA	NM_002143	1	0	na	na	11.5	12	1.04	-0.15	na	na
HPD	NM_002150	1	0	na	na	2.9	3	1.04	-0.08	na	na
HPX	NM_000613	0	0	na	na	5.7	4	0.7	-0.77	na	na
HRH1	NM_001098212	1	1.5	na	na	6.7	8	1.19	0.1	na	na
HRH2	NM_001131055	0	0	na	na	5.7	5	0.87	-0.39	na	na
HRH3	NM_007232	0	0	na	na	4.8	2	0.42	-1.28	na	na
HRH4	NM_001143828	0	0	na	na	12.5	9	0.72	-1.03	na	na
HS3ST5	NM_153612	0	0	na	na	7.7	6	0.78	-0.78	na	na
HS3ST6	NM_001009606	0	0	na	na	3.8	4	1.04	-0.08	na	na
HSBP1L1	NM_001136180	1	0	na	na	70.9	82	1.16	0.06	na	na
HSD11B1	NM_181755	0	0	na	na	2.9	2	0.7	-0.61	na	na
HSD11B2	NM_000196	22	1	na	na	64.2	63	0.98	-0.87	na	na
HSD17B13	NM_001136230	0	0	na	na	13.4	10	0.75	-0.96	na	na
HSD3B7	NM_001142778	7	0	na	na	41.2	45	1.09	-0.13	na	na
HSF2BP	NM_007031	4	0.5	na	na	64.2	53	0.83	-1.63	na	na
HSF4	NM_001040667	1	0	na	na	67.1	62	0.92	-1.21	na	na
HSPA12B	NM_001197327	3	0.5	na	na	4.8	7	1.46	0.5	na	na
HSPA6	NM_002155	1	0	na	na	1.9	6	3.13	1.37	na	na
HSPB9	NM_033194	2	0	na	na	10.5	24	2.28	1.72	na	na
HTR1D	NM_000864	4	1	na	na	38.3	30	0.78	-1.44	na	na
HTR2C	NM_000868	0	0.5	na	na	10.5	10	0.95	-0.38	na	na
HTR3B	NM_006028	1	0	na	na	2.9	10	3.48	1.97	na	na
HTR7	NM_000872	0	0	na	na	16.3	11	0.68	-1.2	na	na
HUS1B	NM_148959	2	0	na	na	9.6	12	1.25	0.28	na	na
HYAL1	NM_153283	0	0	na	na	2.9	3	1.04	-0.08	na	na
ICA1L	NM_178231	3	0.5	na	na	17.2	26	1.51	1.06	na	na
IDNK	NM_001256915	5	0.5	na	na	33.5	24	0.72	-1.78	na	na
IDUA	NM_000203	7	0.5	na	na	23	23	1	-0.37	na	na
IFI16	NM_001206567	1	0	na	na	4.8	2	0.42	-1.28	na	na
IFI27	NM_005532	0	1.5	na	na	9.6	9	0.94	-0.41	na	na
IFI44L	NM_006820	6	0.5	na	na	18.2	23	1.26	0.45	na	na
IFIT2	NM_001547	0	0	na	na	2.9	2	0.7	-0.61	na	na
IFIT3	NM_001031683	4	0	na	na	10.5	13	1.23	0.25	na	na
IFITM10	NM_001170820	3	1	na	na	6.7	11	1.64	0.76	na	na
IGIP	NM_001007189	0	0	na	na	161.9	180	1.11	-0.17	na	na
IGSF1	NM_001170963	4	0	na	na	6.7	7	1.04	-0.18	na	na
IGSF10	NM_001178145	1	0.5	na	na	11.5	16	1.39	0.54	na	na
IGSF21	NM_032880	1	0	na	na	6.7	6	0.89	-0.5	na	na
IGSF22	NM_173588	0	0	na	na	1.9	4	2.09	0.84	na	na
IGSF5	NM_001080444	0	0	na	na	21.1	8	0.38	-2.28	na	na
IHH	NM_002181	0	0	na	na	2.9	6	2.09	1.1	na	na
IKZF1	NM_001220766	2	0	na	na	12.5	10	0.8	-0.78	na	na
IKZF2	NM_016260	10	1	na	na	98.7	129	1.31	0.83	na	na
IKZF4	NM_022465	6	1	na	na	245.2	276	1.13	-0.29	na	na
IL11	NM_000641	0	0	na	na	20.1	17	0.85	-0.77	na	na
IL12A	NM_000882	2	0.5	na	na	92	79	0.86	-1.83	na	na
IL12RB1	NM_153701	0	0	na	na	8.6	24	2.78	2.2	na	na
IL15RA	NM_001256765	10	1	na	na	62.3	56	0.9	-1.2	na	na
IL16	NM_172217	0	0	na	na	2.9	3	1.04	-0.08	na	na
IL17D	NM_138284	6	0.5	na	na	38.3	46	1.2	0.28	na	na
IL17RE	NM_153480	2	1	na	na	23.9	26	1.09	-0.08	na	na
IL18	NM_001243211	3	0	na	na	8.6	7	0.81	-0.7	na	na
IL18BP	NM_001145057	0	0	na	na	60.3	68	1.13	-0.09	na	na
IL1R1	NM_000877	0	0	na	na	64.2	44	0.69	-2.13	na	na
IL2	NM_000586	0	0	na	na	5.7	6	1.04	-0.07	na	na
IL20RB	NM_144717	3	1	na	na	30.7	45	1.47	0.94	na	na
IL21R	NM_021798	1	0.5	na	na	17.2	21	1.22	0.34	na	na
IL23A	NM_016584	0	0.5	na	na	23.9	26	1.09	-0.08	na	na
IL2RB	NM_000878	0	0	na	na	2.9	5	1.74	0.79	na	na
IL32	NM_001012636	6	1	na	na	22	27	1.23	0.34	na	na
IL36G	NM_019618	0	0	na	na	1.9	2	1.04	-0.07	na	na
IL6R	NM_001206866	3	0.5	na	na	20.1	36	1.79	1.66	na	na
IL8	NM_000584	0	0.5	na	na	3.8	8	2.09	1.11	na	na
IL9R	NM_002186	0	0	na	na	42.1	39	0.93	-0.84	na	na
IMPG2	NM_016247	0	0	na	na	8.6	12	1.39	0.54	na	na
INCA1	NM_001167985	1	0.5	na	na	5.7	9	1.57	0.66	na	na
INHA	NM_002191	0	0	na	na	21.1	24	1.14	0.08	na	na
INHBA	NM_002192	3	0.5	na	na	2.9	5	1.74	0.79	na	na
INHBC	NM_005538	0	0	na	na	4.8	5	1.04	-0.07	na	na
INHBE	NM_031479	4	0.5	na	na	15.3	16	1.04	-0.13	na	na
INMT	NM_001199219	0	0	na	na	10.5	3	0.28	-2.28	na	na
INO80B	NM_031288	4	0	na	na	50.8	51	1	-0.65	na	na
INPP5D	NM_005541	1	1.5	na	na	8.6	10	1.16	0.1	na	na
INSC	NM_001042536	0	0	na	na	14.4	10	0.7	-1.13	na	na
INSL3	NM_001265587	0	0	na	na	7.7	3	0.39	-1.74	na	na
IPCEF1	NM_015553	2	0.5	na	na	18.2	22	1.21	0.29	na	na
IQCH	NM_022784	2	0	na	na	13.4	7	0.52	-1.62	na	na
IQSEC2	NM_001243197	1	1.5	na	na	42.1	56	1.33	0.71	na	na
IRF4	NM_001195286	1	0	na	na	9.6	9	0.94	-0.41	na	na
IRF6	NM_001206696	4	0	na	na	20.1	19	0.94	-0.57	na	na
IRF9	NM_006084	5	0.5	na	na	91	90	0.99	-0.96	na	na
IRX4	NM_016358	2	0.5	na	na	6.7	5	0.75	-0.65	na	na
IRX6	NM_024335	3	0.5	na	na	26.8	31	1.16	0.04	na	na
ISG15	NM_005101	5	0	na	na	45	56	1.24	0.43	na	na
ISLR2	NM_001130138	0	0	na	na	14.4	13	0.9	-0.56	na	na
ISM1	NM_080826	5	0.5	na	na	26.8	24	0.89	-0.93	na	na
ISM2	NM_182509	7	0.5	na	na	19.2	33	1.72	1.52	na	na
ISY1	NM_020701	5	1	na	na	565.1	618	1.09	-0.71	na	na
ITGA11	NM_001004439	1	0	na	na	3.8	8	2.09	1.11	na	na
ITGAD	NM_005353	0	0	na	na	3.8	4	1.04	-0.08	na	na
ITGAL	NM_002209	0	0.5	na	na	6.7	7	1.04	-0.18	na	na
ITGB1BP2	NM_012278	0	0	na	na	10.5	14	1.33	0.42	na	na
ITGB3	NM_000212	1	1	na	na	11.5	9	0.78	-0.84	na	na
ITGB8	NM_002214	2	0	na	na	30.7	49	1.6	1.26	na	na
ITGBL1	NM_001271756	0	0	na	na	1.9	2	1.04	-0.07	na	na
ITIH4	NM_001166449	0	0	na	na	49.8	59	1.18	0.18	na	na
ITIH5	NM_001001851	5	1	na	na	7.7	17	2.22	1.38	na	na
ITIH6	NM_198510	0	0	na	na	3.8	5	1.3	0.3	na	na
IZUMO1	NM_182575	0	0	na	na	6.7	14	2.09	1.26	na	na
IZUMO4	NM_001031735	0	0	na	na	8.6	9	1.04	-0.15	na	na
JAKMIP1	NM_144720	12	1	na	na	59.4	61	1.03	-0.62	na	na
JAKMIP2	NM_014790	0	0.5	na	na	19.2	4	0.21	-2.83	na	na
JAKMIP3	NM_001105521	0	0	na	na	12.5	14	1.12	0.1	na	na
JPH4	NM_001146028	0	0	na	na	3.8	7	1.83	0.87	na	na
KATNAL2	NM_031303	4	1	na	na	34.5	42	1.22	0.34	na	na
KATNBL1	NM_024713	5	0	na	na	230.8	233	1.01	-1.2	na	na
KCNA2	NM_001204269	1	0	na	na	6.7	3	0.45	-1.52	na	na
KCNA3	NM_002232	3	1	na	na	8.6	12	1.39	0.54	na	na
KCNA6	NM_002235	1	0.5	na	na	6.7	7	1.04	-0.18	na	na
KCNA7	NM_031886	1	0	na	na	18.2	21	1.15	0.13	na	na
KCNAB1	NM_172160	0	0	na	na	3.8	4	1.04	-0.08	na	na
KCNAB3	NM_004732	0	0	na	na	51.7	44	0.85	-1.2	na	na
KCNB1	NM_004975	0	1	na	na	4.8	10	2.09	1.11	na	na
KCND1	NM_004979	1	0	na	na	26.8	25	0.93	-0.78	na	na
KCND2	NM_012281	1	0	na	na	4.8	4	0.84	-0.46	na	na
KCND3	NM_172198	2	0	na	na	3.8	8	2.09	1.11	na	na
KCNE2	NM_172201	0	0	na	na	1.9	4	2.09	0.84	na	na
KCNF1	NM_002236	4	0.5	na	na	5.7	7	1.22	0.19	na	na
KCNH3	NM_012284	1	0	na	na	30.7	22	0.72	-1.52	na	na
KCNH4	NM_012285	1	0.5	na	na	45	49	1.09	-0.24	na	na
KCNH8	NM_144633	0	0	na	na	2.9	2	0.7	-0.61	na	na
KCNIP2	NM_173197	1	0	na	na	5.7	6	1.04	-0.07	na	na
KCNIP3	NM_001034914	2	0	na	na	48.9	50	1.02	-0.55	na	na
KCNJ10	NM_002241	2	0	na	na	7.7	10	1.3	0.28	na	na
KCNJ12	NM_021012	0	0	na	na	153.3	155	1.01	-0.85	na	na
KCNJ14	NM_013348	0	0.5	na	na	95.8	75	0.78	-2.15	na	na
KCNJ2	NM_000891	3	0	na	na	10.5	21	1.99	1.4	na	na
KCNK12	NM_022055	0	0	na	na	9.6	9	0.94	-0.41	na	na
KCNK13	NM_022054	1	0	na	na	11.5	13	1.13	0.04	na	na
KCNK15	NM_022358	4	1	na	na	11.5	5	0.43	-1.57	na	na
KCNK2	NM_014217	0	0	na	na	1.9	4	2.09	0.84	na	na
KCNK3	NM_002246	0	0	na	na	16.3	11	0.68	-1.2	na	na
KCNK4	NM_033310	0	0	na	na	1.9	3	1.57	0.46	na	na
KCNK7	NM_033347	2	0	na	na	4.8	10	2.09	1.11	na	na
KCNMA1	NM_002247	0	0	na	na	11.5	12	1.04	-0.15	na	na
KCNMB3	NM_171828	0	0	na	na	9.6	11	1.15	0.08	na	na
KCNN2	NM_021614	5	0	na	na	7.7	14	1.83	0.98	na	na
KCNQ1	NM_000218	6	0.5	na	na	33.5	52	1.55	1.38	na	na
KCNQ3	NM_004519	0	0	na	na	6.7	7	1.04	-0.18	na	na
KCNQ4	XM_003960106	3	0.5	na	na	63.2	61	0.96	-0.97	na	na
KCNRG	NM_173605	0	0	na	na	22	36	1.63	1.34	na	na
KCNS3	NM_002252	0	0	na	na	17.2	25	1.45	0.92	na	na
KCNV1	NM_014379	1	0	na	na	7.7	3	0.39	-1.74	na	na
KCP	NM_199349	0	0	na	na	6.7	2	0.3	-1.72	na	na
KCTD16	NM_020768	0	0.5	na	na	5.7	11	1.91	1.08	na	na
KCTD8	NM_198353	2	0.5	na	na	1.9	4	2.09	0.84	na	na
KDM5D	NM_001146705	0	0	na	na	3.8	8	2.09	1.11	na	na
KDR	NM_002253	2	0	na	na	6.7	6	0.89	-0.5	na	na
KEL	NM_000420	0	0	na	na	7.7	9	1.17	0.06	na	na
KHDC1	NM_030568	6	0.5	na	na	20.1	26	1.29	0.52	na	na
KIAA0319	NM_001252328	1	0	na	na	19.2	19	0.99	-0.4	na	na
KIAA1024	NM_015206	5	0.5	na	na	230.8	230	1	-1.32	na	na
KIAA1024L	NM_001257308	0	0	na	na	2.9	2	0.7	-0.61	na	na
KIAA1199	NM_018689	1	0	na	na	1.9	4	2.09	0.84	na	na
KIAA1210	NM_020721	0	0	na	na	1.9	8	4.18	1.75	na	na
KIAA1239	NM_001144990	1	0.5	na	na	10.5	13	1.23	0.25	na	na
KIAA1257	NM_020741	1	0.5	na	na	6.7	10	1.49	0.56	na	na
KIAA1324	NM_001267049	0	0	na	na	23	22	0.96	-0.52	na	na
KIAA1377	NM_020802	7	0.5	na	na	231.8	259	1.12	-0.28	na	na
KIAA1456	NM_020844	0	0	na	na	56.5	69	1.22	0.33	na	na
KIAA1614	NM_020950	0	1	na	na	9.6	4	0.42	-1.64	na	na
KIAA1644	NM_001099294	5	0	na	na	183.9	218	1.19	0.23	na	na
KIAA1984	NM_001039374	0	0.5	na	na	21.1	22	1.04	-0.22	na	na
KIF12	NM_138424	2	0	na	na	14.4	13	0.9	-0.56	na	na
KIF19	NM_153209	0	0	na	na	4.8	2	0.42	-1.28	na	na
KIF25	NM_005355	2	0	na	na	16.3	14	0.86	-0.71	na	na
KIF27	NM_001271927	12	1	na	na	105.4	142	1.35	1.03	na	na
KIFC2	NM_145754	9	0.5	na	na	452.1	377	0.83	-3.26	na	na
KLF1	NM_006563	2	0.5	na	na	7.7	4	0.52	-1.26	na	na
KLF14	NM_138693	10	1	na	na	11.5	18	1.57	0.82	na	na
KLF8	NM_007250	0	0	na	na	26.8	37	1.38	0.71	na	na
KLHDC1	NM_172193	1	0	na	na	16.3	6	0.37	-2.34	na	na
KLHDC8A	NM_001271864	1	0	na	na	6.7	5	0.75	-0.65	na	na
KLHDC9	NM_152366	1	0	na	na	1.9	2	1.04	-0.07	na	na
KLHL10	NM_152467	1	0	na	na	9.6	5	0.52	-1.26	na	na
KLHL3	NM_001257195	3	0.5	na	na	90	84	0.93	-1.32	na	na
KLHL30	NM_198582	5	0	na	na	5.7	10	1.74	0.88	na	na
KLHL31	NM_001003760	1	0.5	na	na	67.1	71	1.06	-0.44	na	na
KLHL35	NM_001039548	0	0	na	na	1.9	2	1.04	-0.07	na	na
KLK1	NM_002257	0	0	na	na	1.9	2	1.04	-0.07	na	na
KLK10	NM_145888	0	0	na	na	6.7	10	1.49	0.56	na	na
KLK14	NM_022046	0	0	na	na	3.8	5	1.3	0.3	na	na
KLK4	NM_004917	1	0	na	na	1.9	4	2.09	0.84	na	na
KLK8	NM_144506	0	0	na	na	6.7	3	0.45	-1.52	na	na
KLLN	NM_001126049	0	0	na	na	32.6	40	1.23	0.27	na	na
KLRC3	NM_002261	0	0	na	na	3.8	4	1.04	-0.08	na	na
KLRG1	NM_005810	5	0	na	na	91	100	1.1	-0.31	na	na
KNDC1	NM_152643	2	0	na	na	14.4	15	1.04	-0.13	na	na
KRT10	NM_000421	4	1	na	na	865	893	1.03	-1.41	na	na
KRT222	NM_152349	4	1	na	na	45	38	0.84	-1.24	na	na
KRTCAP3	NM_173853	0	0	na	na	1.9	2	1.04	-0.07	na	na
KRTDAP	NM_207392	0	0.5	na	na	4.8	5	1.04	-0.07	na	na
KSR2	NM_173598	6	1	na	na	128.4	114	0.89	-1.71	na	na
KYNU	NM_003937	0	0	na	na	4.8	7	1.46	0.5	na	na
L1TD1	NM_019079	0	0	na	na	1.9	4	2.09	0.84	na	na
LAG3	NM_002286	0	0	na	na	3.8	5	1.3	0.3	na	na
LAMB3	NM_001127641	0	0.5	na	na	4.8	6	1.25	0.24	na	na
LAMB4	NM_007356	0	0	na	na	3.8	4	1.04	-0.08	na	na
LANCL3	NM_001170331	2	0	na	na	6.7	3	0.45	-1.52	na	na
LAPTM5	NM_006762	0	0	na	na	5.7	7	1.22	0.19	na	na
LAT	NM_001014989	0	0	na	na	17.2	20	1.16	0.19	na	na
LAT2	NM_014146	0	0	na	na	9.6	5	0.52	-1.26	na	na
LAX1	NM_001136190	0	0	na	na	18.2	9	0.49	-1.94	na	na
LBP	NM_004139	0	0	na	na	1.9	2	1.04	-0.07	na	na
LCA5L	NM_152505	2	0	na	na	25.9	10	0.39	-2.53	na	na
LCAT	NM_000229	0	0	na	na	11.5	12	1.04	-0.15	na	na
LCK	NM_001042771	0	0	na	na	2.9	2	0.7	-0.61	na	na
LCN15	NM_203347	1	0	na	na	17.2	7	0.41	-2.14	na	na
LDB2	NM_001290	0	0	na	na	1.9	4	2.09	0.84	na	na
LDHAL6A	NM_001144071	0	0	na	na	8.6	8	0.93	-0.44	na	na
LDHD	NM_153486	7	1	na	na	21.1	18	0.85	-0.92	na	na
LDLRAD4	NM_001276251	2	0	na	na	102.5	112	1.09	-0.35	na	na
LEAP2	NM_052971	0	0.5	na	na	9.6	20	2.09	1.51	na	na
LEKR1	NM_001193283	1	0	na	na	12.5	25	2.01	1.84	na	na
LEPREL1	NM_018192	13	0.5	na	na	21.1	27	1.28	0.49	na	na
LGI1	NM_005097	1	1	na	na	4.8	6	1.25	0.24	na	na
LGI3	NM_139278	1	0	na	na	11.5	10	0.87	-0.59	na	na
LGSN	NM_016571	0	0	na	na	11.5	20	1.74	1.07	na	na
LHFPL5	NM_182548	0	0	na	na	20.1	37	1.84	1.75	na	na
LHX1	NM_005568	8	0.5	na	na	54.6	61	1.12	-0.11	na	na
LHX3	NM_178138	0	0	na	na	5.7	4	0.7	-0.77	na	na
LIF	NM_002309	0	0	na	na	54.6	47	0.86	-1.42	na	na
LIME1	NM_017806	1	0	na	na	99.6	97	0.97	-1.1	na	na
LIPG	NM_006033	3	0.5	na	na	21.1	34	1.61	1.29	na	na
LIX1	NM_153234	3	0	na	na	11.5	20	1.74	1.07	na	na
LMO1	NM_001270428	11	0	na	na	23.9	28	1.17	0.18	na	na
LMO2	NM_005574	5	0	na	na	36.4	43	1.18	0.21	na	na
LMO3	NM_001243610	0	0	na	na	8.6	4	0.46	-1.46	na	na
LMOD3	NM_198271	0	0	na	na	9.6	9	0.94	-0.41	na	na
LOC100129083	NM_001256795	0	0	na	na	2.9	4	1.39	0.41	na	na
LOC100129924	NM_001242750	0	0	na	na	6.7	9	1.34	0.34	na	na
LOC100130357	NM_001242698	0	0	na	na	27.8	31	1.12	-0.1	na	na
LOC100130451	NM_001242575	0	0	na	na	37.4	45	1.2	0.29	na	na
LOC100130705	NM_001195150	0	0	na	na	26.8	43	1.6	1.27	na	na
LOC100130921	XM_001725085	0	0	na	na	40.2	40	0.99	-0.53	na	na
LOC100144595	NM_001256368	0	0	na	na	9.6	7	0.73	-0.92	na	na
LOC100287177	NM_001242348	1	0	na	na	48.9	48	0.98	-0.76	na	na
LOC100287313	XM_003403816	3	0	na	na	65.1	66	1.01	-0.69	na	na
LOC100288332	XM_003118701	0	0	na	na	6.7	11	1.64	0.76	na	na
LOC100289187	NM_001195543	2	0.5	na	na	23	29	1.26	0.44	na	na
LOC100289561	NM_001242713	0	0	na	na	13.4	6	0.45	-1.94	na	na
LOC100293748	XM_003403712	1	0	na	na	4.8	2	0.42	-1.28	na	na
LOC100505549	NM_001242804	0	1	na	na	79.5	99	1.25	0.46	na	na
LOC100506248	XM_003119527	0	0	na	na	1.9	8	4.18	1.75	na	na
LOC100506310	XM_003119770	1	0	na	na	3.8	4	1.04	-0.08	na	na
LOC100506504	XM_003119801	0	0	na	na	12.5	16	1.28	0.5	na	na
LOC100506562	XM_003118818	0	0	na	na	4.8	5	1.04	-0.07	na	na
LOC100506688	NM_001242737	0	0	na	na	29.7	41	1.38	0.71	na	na
LOC100506859	XM_003119556	0	0	na	na	1.9	2	1.04	-0.07	na	na
LOC100507003	NM_001195256	3	0	na	na	5.7	5	0.87	-0.39	na	na
LOC100507161	XM_003403787	0	0	na	na	8.6	13	1.51	0.73	na	na
LOC100507172	XM_003120009	0	0	na	na	10.5	12	1.14	0.06	na	na
LOC100507462	NM_001242740	2	0.5	na	na	117.8	118	1	-0.92	na	na
LOC100507607	XM_003118719	1	0	na	na	2.9	5	1.74	0.79	na	na
LOC100509263	XM_003403820	0	0	na	na	34.5	33	0.96	-0.68	na	na
LOC100652740	XM_003846586	0	0	na	na	2.9	2	0.7	-0.61	na	na
LOC100652758	XM_003846681	2	0.5	na	na	21.1	26	1.23	0.36	na	na
LOC100652766	XM_003403793	3	0.5	na	na	33.5	30	0.89	-0.93	na	na
LOC100652894	XM_003846638	0	0	na	na	8.6	5	0.58	-1.08	na	na
LOC100652901	XM_003846640	1	1	na	na	110.2	130	1.18	0.16	na	na
LOC100652943	XM_003403477	0	0	na	na	16.3	21	1.29	0.51	na	na
LOC100652953	XM_003403517	0	0	na	na	2.9	3	1.04	-0.08	na	na
LOC100653247	XM_003403788	4	1	na	na	623.6	730	1.17	0.02	na	na
LOC100653334	XM_003846654	18	1	na	na	579.5	586	1.01	-1.53	na	na
LOC100862671	NM_001256829	2	0	na	na	192.5	160	0.83	-2.26	na	na
LOC100996273	XM_003846600	0	0	na	na	4.8	8	1.67	0.73	na	na
LOC100996276	XM_003846265	0	0	na	na	3.8	3	0.78	-0.56	na	na
LOC100996279	XM_003846316	0	0	na	na	3.8	10	2.61	1.49	na	na
LOC100996289	XM_003846608	0	0	na	na	1.9	3	1.57	0.46	na	na
LOC100996300	XM_003846227	0	0	na	na	5.7	2	0.35	-1.52	na	na
LOC100996317	XM_003846563	0	0	na	na	27.8	27	0.97	-0.62	na	na
LOC100996341	XM_003846426	2	0	na	na	155.2	163	1.05	-0.58	na	na
LOC100996356	XM_003846557	0	0	na	na	1.9	2	1.04	-0.07	na	na
LOC100996368	XM_003846287	0	0	na	na	6.7	5	0.75	-0.65	na	na
LOC100996382	XM_003846603	1	0	na	na	24.9	22	0.88	-0.8	na	na
LOC100996405	XM_003846292	0	0	na	na	3.8	5	1.3	0.3	na	na
LOC100996412	XM_003846568	0	0	na	na	14.4	7	0.49	-1.76	na	na
LOC100996426	XM_003846706	0	0	na	na	12.5	16	1.28	0.5	na	na
LOC100996482	XM_003846716	0	0	na	na	12.5	13	1.04	-0.13	na	na
LOC100996485	XM_003846680	0	0	na	na	3.8	8	2.09	1.11	na	na
LOC100996499	XM_003846277	0	0	na	na	2.9	4	1.39	0.41	na	na
LOC100996515	XM_003846551	0	0	na	na	24.9	27	1.08	-0.21	na	na
LOC100996519	XM_003846710	0	0	na	na	60.3	68	1.13	-0.09	na	na
LOC100996528	XM_003846589	0	0	na	na	120.7	119	0.99	-1.02	na	na
LOC100996546	XM_003846664	0	0	na	na	231.8	241	1.04	-0.93	na	na
LOC100996571	XM_003846631	0	0	na	na	28.7	42	1.46	0.92	na	na
LOC100996573	XM_003846565	0	0.5	na	na	37.4	26	0.7	-1.88	na	na
LOC100996577	XM_003846242	0	0	na	na	4.8	8	1.67	0.73	na	na
LOC100996584	XM_003846222	0	0	na	na	192.5	159	0.83	-2.3	na	na
LOC100996598	XM_003846643	0	0	na	na	3.8	3	0.78	-0.56	na	na
LOC100996605	XM_003846539	0	0	na	na	33.5	59	1.76	1.92	na	na
LOC100996610	XM_003960475	0	0	na	na	3.8	8	2.09	1.11	na	na
LOC100996612	XM_003846413	2	0	na	na	10.5	12	1.14	0.06	na	na
LOC100996614	XM_003846617	0	0	na	na	21.1	28	1.33	0.62	na	na
LOC100996641	XM_003846687	0	0	na	na	5.7	10	1.74	0.88	na	na
LOC100996677	XM_003846704	0	0	na	na	15.3	19	1.24	0.39	na	na
LOC100996689	XM_003846432	3	1	na	na	31.6	36	1.14	-0.02	na	na
LOC100996779	XM_003846741	0	0	na	na	92	124	1.35	0.95	na	na
LOC100996780	XM_003846634	0	0	na	na	1.9	3	1.57	0.46	na	na
LOC100996805	XM_003846576	0	0	na	na	26.8	19	0.71	-1.57	na	na
LOC100996863	XM_003846674	0	0	na	na	2.9	4	1.39	0.41	na	na
LOC100996897	XM_003846678	2	0.5	na	na	66.1	67	1.01	-0.69	na	na
LOC101059934	XM_003959935	0	0	na	na	10.5	10	0.95	-0.38	na	na
LOC101059953	XM_003960884	0	0	na	na	9.6	7	0.73	-0.92	na	na
LOC101059957	XM_003959975	0	0	na	na	2.9	3	1.04	-0.08	na	na
LOC101059966	XM_003960939	0	1.5	na	na	1.9	7	3.65	1.58	na	na
LOC101059970	XM_003960898	0	0	na	na	30.7	33	1.08	-0.23	na	na
LOC101059976	XM_003959913	2	0.5	na	na	32.6	38	1.17	0.07	na	na
LOC101060037	XM_003960908	0	0	na	na	64.2	82	1.28	0.62	na	na
LOC101060091	XM_003960298	0	0	na	na	4.8	10	2.09	1.11	na	na
LOC101060117	XM_003960875	0	0	na	na	3.8	2	0.52	-0.99	na	na
LOC101060133	XM_003959997	0	0	na	na	8.6	8	0.93	-0.44	na	na
LOC101060155	XM_003959982	0	0	na	na	3.8	9	2.35	1.31	na	na
LOC101060179	XM_003960864	0	0	na	na	37.4	45	1.2	0.29	na	na
LOC101060181	XM_003960891	1	0.5	na	na	1.9	2	1.04	-0.07	na	na
LOC101060202	XM_003960060	0	0	na	na	1.9	2	1.04	-0.07	na	na
LOC101060226	XM_003960069	0	0	na	na	8.6	12	1.39	0.54	na	na
LOC101060238	XM_003960194	0	0	na	na	1.9	5	2.61	1.13	na	na
LOC101060252	XM_003960643	1	0.5	na	na	11.5	8	0.7	-1.02	na	na
LOC101060335	XM_003960490	0	0	na	na	10.5	7	0.66	-1.12	na	na
LOC101060378	XM_003960103	4	0	na	na	69	65	0.94	-1.1	na	na
LOC101060386	XM_003960649	0	0	na	na	3.8	3	0.78	-0.56	na	na
LOC101060394	XM_003960650	0	0	na	na	24.9	33	1.33	0.55	na	na
LOC101060400	XM_003960739	3	1	na	na	24.9	28	1.12	-0.07	na	na
LOC101060444	XM_003960387	0	0	na	na	14.4	18	1.25	0.42	na	na
LOC101060445	XM_003960442	0	0	na	na	4.8	3	0.63	-0.94	na	na
LOC101060458	XM_003960530	2	0	na	na	10.5	4	0.38	-1.8	na	na
LOC101060471	XM_003960717	0	1	na	na	5.7	9	1.57	0.66	na	na
LOC101060478	XM_003960165	1	0	na	na	14.4	10	0.7	-1.13	na	na
LOC101060488	XM_003960550	0	0.5	na	na	8.6	15	1.74	1.07	na	na
LOC101060511	XM_003960173	4	0	na	na	2.9	4	1.39	0.41	na	na
LOC101060581	XM_003960472	0	0	na	na	1.9	3	1.57	0.46	na	na
LOC101060591	XM_003960444	0	1.5	na	na	19.2	14	0.73	-1.2	na	na
LOC101060601	XM_003960210	0	0	na	na	1.9	2	1.04	-0.07	na	na
LOC101060604	XM_003960632	0	0	na	na	2.9	3	1.04	-0.08	na	na
LOC101060662	XM_003960428	0	0	na	na	3.8	2	0.52	-0.99	na	na
LOC101060664	XM_003960129	2	0	na	na	21.1	33	1.57	1.19	na	na
LOC101060672	XM_003960130	0	0	na	na	14.4	8	0.56	-1.48	na	na
LOC101060673	XM_003960311	0	0	na	na	9.6	13	1.36	0.48	na	na
LOC101060691	XM_003960478	6	0	na	na	295	335	1.14	-0.18	na	na
LOC101060704	XM_003960233	0	0	na	na	8.6	7	0.81	-0.7	na	na
LOC101060710	XM_003960297	2	0	na	na	233.7	294	1.26	0.81	na	na
LOC101060718	XM_003960824	0	0	na	na	48.9	45	0.92	-1.08	na	na
LOC101060751	XM_003960870	1	0	na	na	1.9	3	1.57	0.46	na	na
LOC256021	NM_001256374	0	0	na	na	39.3	25	0.64	-2.22	na	na
LOC284385	NM_001242812	4	0	na	na	57.5	77	1.34	0.8	na	na
LOC285423	XM_003403779	1	0	na	na	7.7	8	1.04	-0.18	na	na
LOC339862	NM_001257177	0	0	na	na	1.9	2	1.04	-0.07	na	na
LOC388210	XM_003960647	1	0	na	na	23.9	13	0.54	-2.1	na	na
LOC389831	NM_001242480	2	0	na	na	59.4	46	0.77	-1.95	na	na
LOC389895	NM_001271560	3	0.5	na	na	21.1	31	1.47	0.97	na	na
LOC391322	NM_001144931	5	0.5	na	na	5.7	7	1.22	0.19	na	na
LOC400499	XM_003119653	2	0.5	na	na	49.8	65	1.3	0.67	na	na
LOC401052	NM_001008737	0	0	na	na	7.7	2	0.26	-1.9	na	na
LOC401180	XM_379325	0	0	na	na	1.9	4	2.09	0.84	na	na
LOC402160	NM_001193282	0	0	na	na	1.9	2	1.04	-0.07	na	na
LOC440292	XM_001714437	0	0	na	na	4.8	6	1.25	0.24	na	na
LOC441124	XM_003846431	0	0	na	na	28.7	22	0.77	-1.3	na	na
LOC643355	NM_001270945	0	0	na	na	4.8	2	0.42	-1.28	na	na
LOC643669	NM_001243212	0	0	na	na	6.7	8	1.19	0.1	na	na
LOC646021	XM_933339	2	1	na	na	30.7	21	0.69	-1.68	na	na
LOC646543	XM_933688	1	0	na	na	46	37	0.8	-1.44	na	na
LOC646730	XM_933859	0	0.5	na	na	4.8	3	0.63	-0.94	na	na
LOC650157	XM_001129774	1	0	na	na	3.8	2	0.52	-0.99	na	na
LOC728715	XM_003119524	0	0	na	na	2.9	3	1.04	-0.08	na	na
LOC729059	NM_001242521	0	0	na	na	4.8	3	0.63	-0.94	na	na
LOC729175	XM_001717514	0	0.5	na	na	1.9	4	2.09	0.84	na	na
LOC730183	NM_001256932	2	0	na	na	166.7	168	1.01	-0.88	na	na
LOC731282	XM_001717170	2	1	na	na	26.8	27	1.01	-0.49	na	na
LOC732265	XM_003118667	0	0	na	na	5.7	4	0.7	-0.77	na	na
LOXL4	NM_032211	3	0.5	na	na	14.4	23	1.6	1.16	na	na
LPAR2	NM_004720	0	0	na	na	31.6	35	1.11	-0.13	na	na
LPAR4	NM_005296	0	0	na	na	3.8	3	0.78	-0.56	na	na
LPPR5	NM_001010861	2	0	na	na	10.5	20	1.9	1.28	na	na
LRAT	NM_004744	3	0	na	na	25.9	33	1.28	0.41	na	na
LRG1	NM_052972	0	0	na	na	5.7	9	1.57	0.66	na	na
LRIT3	NM_198506	0	0.5	na	na	15.3	27	1.76	1.45	na	na
LRP2BP	NM_018409	0	0	na	na	11.5	14	1.22	0.22	na	na
LRP5L	NM_001135772	0	1.5	na	na	86.2	111	1.29	0.66	na	na
LRRC10B	NM_001145077	1	0	na	na	14.4	14	0.97	-0.34	na	na
LRRC2	NM_024512	0	0	na	na	27.8	24	0.86	-1.06	na	na
LRRC23	NM_006992	6	1	na	na	51.7	54	1.04	-0.45	na	na
LRRC29	NM_001004055	1	0.5	na	na	27.8	29	1.04	-0.35	na	na
LRRC32	NM_001128922	3	0	na	na	11.5	10	0.87	-0.59	na	na
LRRC36	NM_001161575	1	0	na	na	8.6	11	1.28	0.33	na	na
LRRC37A3	NM_199340	0	0	na	na	17.2	24	1.39	0.78	na	na
LRRC39	NM_001256387	0	0	na	na	62.3	77	1.24	0.43	na	na
LRRC43	NM_152759	0	0	na	na	3.8	3	0.78	-0.56	na	na
LRRC56	NM_198075	0	0	na	na	14.4	19	1.32	0.58	na	na
LRRC63	XM_003403659	1	0	na	na	12.5	13	1.04	-0.13	na	na
LRRC66	NM_001024611	1	0	na	na	5.7	4	0.7	-0.77	na	na
LRRC7	NM_020794	0	0	na	na	4.8	4	0.84	-0.46	na	na
LRRC70	NM_181506	0	0	na	na	12.5	12	0.96	-0.37	na	na
LRRC73	NM_001271882	3	1	na	na	10.5	15	1.42	0.59	na	na
LRRK1	NM_024652	1	2	na	na	46.9	50	1.07	-0.35	na	na
LTB	NM_002341	0	0	na	na	1.9	2	1.04	-0.07	na	na
LTB4R	NM_001143919	3	0	na	na	128.4	140	1.09	-0.48	na	na
LTB4R2	NM_019839	1	0	na	na	95.8	110	1.15	-0.02	na	na
LTC4S	NM_145867	0	0.5	na	na	6.7	10	1.49	0.56	na	na
LUC7L2	NM_001244585	0	0	na	na	14.4	20	1.39	0.74	na	na
LURAP1L	NM_203403	0	0.5	na	na	15.3	19	1.24	0.39	na	na
LUZP4	NM_016383	0	0	na	na	2.9	4	1.39	0.41	na	na
LY6G5C	NM_025262	0	0	na	na	4.8	5	1.04	-0.07	na	na
LY6G6F	NM_001003693	1	0	na	na	1.9	2	1.04	-0.07	na	na
LY6K	NM_017527	1	0.5	na	na	10.5	5	0.47	-1.42	na	na
LYG1	NM_174898	0	0.5	na	na	48.9	49	1	-0.65	na	na
LYG2	NM_175735	1	0	na	na	5.7	2	0.35	-1.52	na	na
LYNX1	NM_177476	1	0.5	na	na	6.7	4	0.6	-1.03	na	na
LYPD3	NM_014400	0	1	na	na	34.5	38	1.1	-0.09	na	na
LYPD6	NM_194317	1	0	na	na	176.3	170	0.96	-1.19	na	na
LYPD6B	NM_177964	7	1	na	na	48.9	58	1.19	0.19	na	na
LYRM9	NM_001076680	2	0	na	na	78.5	73	0.93	-1.18	na	na
M1AP	NM_138804	0	0	na	na	7.7	6	0.78	-0.78	na	na
MAB21L2	NM_006439	0	0	na	na	2.9	3	1.04	-0.08	na	na
MAB21L3	NM_152367	0	0	na	na	85.3	97	1.14	-0.1	na	na
MACROD2	NM_080676	9	0.5	na	na	21.1	32	1.52	1.08	na	na
MAFA	NM_201589	8	1	na	na	59.4	50	0.84	-1.53	na	na
MAGEA1	NM_004988	0	0.5	na	na	3.8	3	0.78	-0.56	na	na
MAGEB2	NM_002364	8	0	na	na	9.6	11	1.15	0.08	na	na
MAGEB6	NM_173523	3	0.5	na	na	2.9	3	1.04	-0.08	na	na
MAGEH1	NM_014061	5	0	na	na	13.4	17	1.27	0.46	na	na
MAGEL2	NM_019066	4	1	na	na	5.7	9	1.57	0.66	na	na
MAGI2	NM_012301	12	0.5	na	na	126.4	125	0.99	-1.17	na	na
MAL2	NM_052886	0	0	na	na	6.7	5	0.75	-0.65	na	na
MAMDC2	NM_153267	1	1	na	na	2.9	4	1.39	0.41	na	na
MAMDC4	NM_206920	0	0	na	na	42.1	43	1.02	-0.42	na	na
MAP1LC3A	NM_181509	0	0	na	na	3.8	9	2.35	1.31	na	na
MAP1LC3B	NM_022818	1	3.5	na	na	1355.4	1549	1.14	-0.18	na	na
MAP1LC3B2	NM_001085481	0	0	na	na	5.7	2	0.35	-1.52	na	na
MAP1LC3C	NM_001004343	2	0.5	na	na	6.7	8	1.19	0.1	na	na
MAP2	NM_031845	2	0.5	na	na	15.3	15	0.98	-0.32	na	na
MAP4K1	NM_001042600	8	0	na	na	37.4	55	1.47	1.16	na	na
MAP6	NM_033063	2	0	na	na	9.6	6	0.63	-1.24	na	na
MAPK10	NM_138982	1	0	na	na	19.2	22	1.15	0.11	na	na
MAPK11	NM_002751	4	0	na	na	80.5	70	0.87	-1.56	na	na
MAPK4	NM_002747	7	1	na	na	75.7	87	1.15	0.02	na	na
MARCH2	NM_001005416	2	0.5	na	na	144.6	161	1.11	-0.34	na	na
MARVELD3	NM_001271329	0	0	na	na	21.1	38	1.8	1.68	na	na
MAST4	NM_198828	1	0.5	na	na	12.5	16	1.28	0.5	na	na
MAT1A	NM_000429	1	0.5	na	na	1.9	4	2.09	0.84	na	na
MATN1	NM_002379	2	0	na	na	23	21	0.91	-0.68	na	na
MATN4	NM_030592	1	1	na	na	7.7	5	0.65	-0.88	na	na
MC1R	NM_002386	2	0.5	na	na	92	88	0.96	-1.17	na	na
MCF2	NM_001171878	0	0	na	na	3.8	4	1.04	-0.08	na	na
MCF2L2	NM_015078	4	0.5	na	na	26.8	30	1.12	-0.09	na	na
MCTP1	NM_024717	8	1	na	na	32.6	36	1.11	-0.13	na	na
MDFIC	NM_001166346	5	0.5	na	na	57.5	70	1.22	0.32	na	na
MEF2BNB	NM_001145783	2	0.5	na	na	131.2	163	1.24	0.43	na	na
MEFV	NM_000243	0	0	na	na	6.7	8	1.19	0.1	na	na
MEGF6	NM_001409	8	1	na	na	76.6	56	0.73	-2.24	na	na
MEI1	NM_152513	2	0	na	na	9.6	12	1.25	0.28	na	na
MEIG1	NM_001080836	0	0	na	na	5.7	8	1.39	0.42	na	na
MEIS3	NM_020160	4	0.5	na	na	81.4	77	0.95	-1.24	na	na
MEP1A	NM_005588	0	0	na	na	2.9	2	0.7	-0.61	na	na
MEP1B	NM_005925	0	0	na	na	5.7	6	1.04	-0.07	na	na
MESP2	NM_001039958	4	0.5	na	na	23	29	1.26	0.44	na	na
MEST	NM_177525	1	0	na	na	4.8	10	2.09	1.11	na	na
METTL11B	NM_001136107	1	1	na	na	4.8	2	0.42	-1.28	na	na
METTL12	NM_001043229	2	0.5	na	na	110.2	114	1.03	-0.7	na	na
METTL20	NM_001135864	8	0.5	na	na	44.1	53	1.2	0.29	na	na
METTL24	NM_001123364	4	0	na	na	12.5	10	0.8	-0.78	na	na
METTL2B	NM_018396	17	1	na	na	85.3	111	1.3	0.73	na	na
MFAP3L	NM_021647	17	1	na	na	299.8	346	1.15	-0.03	na	na
MFSD4	NM_181644	7	0.5	na	na	38.3	57	1.49	1.2	na	na
MGAM	NM_004668	0	0	na	na	4.8	4	0.84	-0.46	na	na
MGAT4C	NM_013244	0	0	na	na	2.9	6	2.09	1.1	na	na
MGC50722	NM_203348	0	0	na	na	4.8	21	4.38	2.38	na	na
MGLL	NM_001003794	8	0	na	na	73.8	75	1.02	-0.67	na	na
MICALCL	NM_032867	0	0.5	na	na	1.9	3	1.57	0.46	na	na
MIP	NM_012064	0	0.5	na	na	8.6	11	1.28	0.33	na	na
MIXL1	NM_031944	5	0.5	na	na	13.4	9	0.67	-1.21	na	na
MKRN3	NM_005664	2	0.5	na	na	12.5	14	1.12	0.1	na	na
MLH1	NM_001258271	0	0	na	na	1.9	2	1.04	-0.07	na	na
MLKL	NM_152649	0	0	na	na	1.9	2	1.04	-0.07	na	na
MLNR	NM_001507	5	0.5	na	na	1.9	6	3.13	1.37	na	na
MMD	NM_012329	6	0.5	na	na	569.9	596	1.05	-1.18	na	na
MMP14	NM_004995	0	0.5	na	na	32.6	26	0.8	-1.36	na	na
MMP24	NM_006690	0	0	na	na	5.7	10	1.74	0.88	na	na
MMP25	NM_022468	1	0.5	na	na	8.6	9	1.04	-0.15	na	na
MMP9	NM_004994	2	1	na	na	3.8	6	1.57	0.61	na	na
MMRN2	NM_024756	0	0	na	na	6.7	7	1.04	-0.18	na	na
MOB3C	NM_145279	4	1	na	na	63.2	46	0.73	-2.26	na	na
MORN3	NM_173855	0	0	na	na	3.8	5	1.3	0.3	na	na
MPL	NM_005373	1	0	na	na	11.5	11	0.96	-0.36	na	na
MPPED1	NM_001044370	2	0	na	na	22	27	1.23	0.34	na	na
MPZ	NM_000530	1	1	na	na	39.3	39	0.99	-0.54	na	na
MRO	NM_001127176	1	0	na	na	19.2	18	0.94	-0.58	na	na
MROH2B	NM_173489	0	0	na	na	2.9	4	1.39	0.41	na	na
MROH8	NM_152503	4	0.5	na	na	13.4	23	1.72	1.37	na	na
MSANTD1	NM_001042690	0	1	na	na	6.7	3	0.45	-1.52	na	na
MSANTD3	NM_001198807	0	0	na	na	451.2	535	1.19	0.31	na	na
MSC	NM_005098	3	0	na	na	13.4	8	0.6	-1.34	na	na
MSH4	NM_002440	2	0	na	na	32.6	16	0.49	-2.4	na	na
MSH5	NM_172165	1	0	na	na	3.8	3	0.78	-0.56	na	na
MSS51	NM_001024593	0	0.5	na	na	56.5	44	0.78	-1.59	na	na
MST1	NM_020998	0	0	na	na	6.7	9	1.34	0.34	na	na
MT1A	NM_005946	0	0	na	na	1.9	4	2.09	0.84	na	na
MT1F	NM_005949	1	4	na	na	28.7	30	1.04	-0.35	na	na
MTCP1	NM_001018025	6	1	na	na	139.9	129	0.92	-1.65	na	na
MTNR1A	NM_005958	1	0	na	na	8.6	8	0.93	-0.44	na	na
MTTP	NM_000253	1	0.5	na	na	4.8	7	1.46	0.5	na	na
MTUS2	NM_015233	1	1	na	na	9.6	11	1.15	0.08	na	na
MUC1	NM_001204290	0	0	na	na	11.5	10	0.87	-0.59	na	na
MUC19	XM_003846558	0	0	na	na	2.9	2	0.7	-0.61	na	na
MUC20	NM_152673	0	0	na	na	21.1	20	0.95	-0.55	na	na
MUC21	NM_001010909	0	0	na	na	5.7	6	1.04	-0.07	na	na
MURC	NM_001018116	0	0	na	na	134.1	164	1.22	0.32	na	na
MXRA5	NM_015419	0	0	na	na	1.9	2	1.04	-0.07	na	na
MXRA8	NM_032348	5	0.5	na	na	13.4	19	1.42	0.79	na	na
MYBPC2	NM_004533	0	0.5	na	na	2.9	3	1.04	-0.08	na	na
MYCL1	NM_005376	10	0.5	na	na	46.9	54	1.15	0.04	na	na
MYCN	NM_005378	1	0	na	na	3.8	2	0.52	-0.99	na	na
MYEOV	NM_138768	0	0	na	na	7.7	3	0.39	-1.74	na	na
MYH11	NM_002474	0	0	na	na	5.7	8	1.39	0.42	na	na
MYH15	NM_014981	0	0	na	na	22	27	1.23	0.34	na	na
MYH3	NM_002470	1	1	na	na	79.5	74	0.93	-1.17	na	na
MYH7B	NM_020884	0	0	na	na	6.7	5	0.75	-0.65	na	na
MYL10	NM_138403	0	0	na	na	3.8	4	1.04	-0.08	na	na
MYL5	NM_002477	9	1	na	na	52.7	78	1.48	1.3	na	na
MYLK	NM_053031	0	1	na	na	32.6	57	1.75	1.61	na	na
MYLK2	NM_033118	0	0	na	na	23	14	0.61	-1.75	na	na
MYLK3	NM_182493	0	0	na	na	45	60	1.33	0.77	na	na
MYLK4	NM_001012418	3	1	na	na	22	36	1.63	1.34	na	na
MYLPF	NM_013292	0	0	na	na	17.2	9	0.52	-1.81	na	na
MYO15A	NM_016239	1	0	na	na	7.7	5	0.65	-0.88	na	na
MYO18B	NM_032608	0	0	na	na	2.9	2	0.7	-0.61	na	na
MYO1A	NM_005379	0	0	na	na	1.9	5	2.61	1.13	na	na
MYO1F	NM_012335	3	0.5	na	na	7.7	18	2.35	1.5	na	na
MYO1H	NM_001101421	0	0	na	na	3.8	3	0.78	-0.56	na	na
MYO7A	NM_001127180	4	1	na	na	4.8	11	2.3	1.27	na	na
MYOM1	NM_019856	1	0	na	na	12.5	9	0.72	-1.03	na	na
MYOZ1	NM_021245	2	0	na	na	1.9	6	3.13	1.37	na	na
MYPN	NM_001256267	1	0	na	na	6.7	4	0.6	-1.03	na	na
MYZAP	NM_152451	1	0	na	na	10.5	12	1.14	0.06	na	na
N4BP2L1	NM_052818	4	0	na	na	16.3	24	1.47	0.91	na	na
NAALADL1	NM_005468	0	0	na	na	1.9	2	1.04	-0.07	na	na
NAIP	XM_003846791	1	0	na	na	31.6	56	1.77	1.65	na	na
NALCN	NM_052867	1	0	na	na	4.8	2	0.42	-1.28	na	na
NANOG	NM_024865	0	0	na	na	4.8	5	1.04	-0.07	na	na
NANOGNB	NM_001145465	0	0	na	na	6.7	3	0.45	-1.52	na	na
NANOS3	NM_001098622	0	0	na	na	6.7	11	1.64	0.76	na	na
NAPSA	NM_004851	0	0	na	na	7.7	7	0.91	-0.46	na	na
NAT2	NM_000015	2	0	na	na	4.8	4	0.84	-0.46	na	na
NAV3	NM_014903	1	0.5	na	na	6.7	4	0.6	-1.03	na	na
NBPF1	NM_017940	0	0	na	na	4.8	2	0.42	-1.28	na	na
NBPF12	XM_003846733	0	0	na	na	4.8	2	0.42	-1.28	na	na
NCALD	NM_001040627	5	1	na	na	47.9	60	1.25	0.46	na	na
NCAN	NM_004386	5	1	na	na	10.5	11	1.04	-0.15	na	na
NCKAP5	NM_207481	0	0	na	na	11.5	8	0.7	-1.02	na	na
NDST3	NM_004784	0	0	na	na	13.4	7	0.52	-1.62	na	na
NDST4	NM_022569	1	1.5	na	na	18.2	16	0.88	-0.65	na	na
NDUFA4L2	NM_020142	2	1	na	na	10.5	12	1.14	0.06	na	na
NEB	NM_004543	0	0	na	na	23.9	30	1.25	0.42	na	na
NECAB2	NM_019065	1	1	na	na	46.9	36	0.77	-1.65	na	na
NEFH	NM_021076	2	1	na	na	6.7	8	1.19	0.1	na	na
NEK5	NM_199289	4	0	na	na	14.4	23	1.6	1.16	na	na
NELL1	NM_201551	1	0	na	na	1.9	2	1.04	-0.07	na	na
NEURL	NM_004210	3	1	na	na	32.6	29	0.89	-0.95	na	na
NEUROD1	NM_002500	0	0	na	na	9.6	7	0.73	-0.92	na	na
NEUROD2	NM_006160	1	0	na	na	9.6	6	0.63	-1.24	na	na
NEUROG2	NM_024019	6	1	na	na	46.9	64	1.36	0.89	na	na
NHLH1	NM_005598	0	0	na	na	10.5	24	2.28	1.72	na	na
NHLH2	NM_001111061	0	1	na	na	58.4	63	1.08	-0.29	na	na
NIM1	NM_153361	2	0.5	na	na	13.4	15	1.12	0.08	na	na
NIPAL4	NM_001172292	0	1	na	na	7.7	3	0.39	-1.74	na	na
NIPSNAP3B	NM_018376	1	1.5	na	na	34.5	35	1.01	-0.44	na	na
NKAIN2	NM_153355	0	0.5	na	na	25.9	25	0.97	-0.64	na	na
NKPD1	NM_198478	8	0	na	na	10.5	12	1.14	0.06	na	na
NKX1-2	NM_001146340	14	0.5	na	na	23.9	25	1.04	-0.22	na	na
NKX3-1	NM_006167	7	1	na	na	42.1	55	1.3	0.64	na	na
NKX6-2	NM_177400	0	0.5	na	na	5.7	3	0.52	-1.25	na	na
NLGN3	NM_001166660	0	3	na	na	40.2	49	1.22	0.34	na	na
NLRP1	NM_001033053	0	0	na	na	4.8	6	1.25	0.24	na	na
NLRP11	NM_145007	2	1	na	na	5.7	7	1.22	0.19	na	na
NLRP12	NM_144687	0	0	na	na	7.7	4	0.52	-1.26	na	na
NLRP14	NM_176822	4	0.5	na	na	12.5	14	1.12	0.1	na	na
NMBR	NM_002511	0	0	na	na	2.9	4	1.39	0.41	na	na
NME5	NM_003551	5	0	na	na	14.4	12	0.84	-0.8	na	na
NME9	NM_178130	1	0.5	na	na	3.8	3	0.78	-0.56	na	na
NMNAT3	NM_001200047	2	0.5	na	na	34.5	37	1.07	-0.21	na	na
NMRK2	NM_170678	1	0.5	na	na	7.7	12	1.57	0.66	na	na
NMUR1	NM_006056	3	0	na	na	28.7	24	0.84	-1.19	na	na
NMUR2	NM_020167	1	1	na	na	3.8	6	1.57	0.61	na	na
NNAT	NM_005386	3	0.5	na	na	1.9	44	22.97	4	na	na
NOD2	NM_022162	1	0	na	na	7.7	4	0.52	-1.26	na	na
NOMO2	NM_001004060	3	0	na	na	5.7	5	0.87	-0.39	na	na
NOMO3	NM_001004067	1	0	na	na	11.5	12	1.04	-0.15	na	na
NOS3	NM_001160111	0	0	na	na	7.7	6	0.78	-0.78	na	na
NOTCH4	NM_004557	0	0	na	na	14.4	16	1.11	0.07	na	na
NOTUM	NM_178493	2	0.5	na	na	30.7	39	1.27	0.4	na	na
NOXA1	NM_001256068	5	0.5	na	na	59.4	62	1.04	-0.52	na	na
NOXO1	NM_144603	0	0	na	na	4.8	4	0.84	-0.46	na	na
NOXRED1	NM_001113475	0	0.5	na	na	8.6	6	0.7	-1.02	na	na
NPAS2	NM_002518	25	1	na	na	165.7	200	1.21	0.41	na	na
NPAS3	NM_022123	3	0	na	na	14.4	14	0.97	-0.34	na	na
NPB	NM_148896	0	0	na	na	4.8	3	0.63	-0.94	na	na
NPEPL1	NM_001204872	0	1	na	na	6.7	4	0.6	-1.03	na	na
NPFF	NM_003717	0	0	na	na	15.3	10	0.65	-1.28	na	na
NPFFR2	NM_004885	2	1	na	na	9.6	9	0.94	-0.41	na	na
NPHP3	NM_153240	0	0.5	na	na	243.3	258	1.06	-0.75	na	na
NPM2	NM_182795	0	0	na	na	4.8	9	1.88	0.93	na	na
NPR1	NM_000906	7	0.5	na	na	11.5	16	1.39	0.54	na	na
NPR2	NM_003995	0	0	na	na	1.9	3	1.57	0.46	na	na
NPR3	NM_001204376	0	0	na	na	6.7	7	1.04	-0.18	na	na
NPW	NM_001099456	0	0	na	na	4.8	4	0.84	-0.46	na	na
NPY	NM_000905	5	0	na	na	8.6	7	0.81	-0.7	na	na
NPY5R	NM_006174	7	1	na	na	10.5	17	1.61	0.89	na	na
NR2E1	NM_003269	0	0	na	na	25.9	23	0.89	-0.78	na	na
NR5A1	NM_004959	1	0	na	na	5.7	6	1.04	-0.07	na	na
NRG4	NM_138573	3	0	na	na	39.3	48	1.22	0.36	na	na
NRIP2	NM_031474	0	0.5	na	na	6.7	5	0.75	-0.65	na	na
NRL	NM_006177	1	0.5	na	na	18.2	26	1.43	0.87	na	na
NRTN	NM_004558	1	0	na	na	111.1	132	1.19	0.2	na	na
NRXN1	NM_004801	0	0	na	na	5.7	9	1.57	0.66	na	na
NRXN2	NM_138734	3	0	na	na	26.8	22	0.82	-1.06	na	na
NT5E	NM_001204813	2	0.5	na	na	16.3	18	1.11	0.04	na	na
NT5M	NM_020201	4	1	na	na	104.4	122	1.17	0.09	na	na
NTN3	NM_006181	3	0	na	na	4.8	3	0.63	-0.94	na	na
NTN5	NM_145807	0	0	na	na	2.9	2	0.7	-0.61	na	na
NTNG2	NM_032536	2	0.5	na	na	18.2	30	1.65	1.37	na	na
NTRK1	NM_001007792	1	0	na	na	6.7	14	2.09	1.26	na	na
NTRK2	NM_001018064	3	0	na	na	8.6	13	1.51	0.73	na	na
NTRK3	NM_001243101	0	0	na	na	1.9	3	1.57	0.46	na	na
NTS	NM_006183	2	0.5	na	na	11.5	7	0.61	-1.3	na	na
NUDT10	NM_153183	2	0.5	na	na	329.5	346	1.05	-0.97	na	na
NUDT4	NM_019094	3	0	na	na	58.4	65	1.11	-0.13	na	na
NUGGC	NM_001010906	0	0	na	na	10.5	15	1.42	0.59	na	na
NUP210L	NM_001159484	0	0	na	na	5.7	4	0.7	-0.77	na	na
NXPH3	NM_007225	0	0.5	na	na	18.2	10	0.55	-1.69	na	na
NYAP1	NM_173564	2	0.5	na	na	18.2	27	1.48	1	na	na
OASL	NM_001261825	0	0	na	na	4.8	3	0.63	-0.94	na	na
OAZ3	NM_016178	1	0.5	na	na	23	18	0.78	-1.22	na	na
OCLM	NM_022375	0	0	na	na	30.7	35	1.14	-0.01	na	na
ODF3L1	NM_175881	1	0	na	na	5.7	4	0.7	-0.77	na	na
ODF3L2	NM_182577	0	0.5	na	na	5.7	16	2.78	1.85	na	na
OLFM1	NM_006334	0	0	na	na	8.6	18	2.09	1.51	na	na
OLFM3	NM_058170	0	1	na	na	2.9	3	1.04	-0.08	na	na
OLFML2B	NM_015441	17	1	na	na	19.2	28	1.46	0.95	na	na
OLFML3	NM_020190	0	0	na	na	2.9	2	0.7	-0.61	na	na
OPRL1	NM_000913	1	1	na	na	26.8	20	0.75	-1.39	na	na
OR13A1	NM_001004297	0	0	na	na	1.9	2	1.04	-0.07	na	na
OR2AG2	NM_001004490	0	0	na	na	1.9	3	1.57	0.46	na	na
OR7D2	NM_175883	0	0	na	na	27.8	11	0.4	-2.48	na	na
OSCAR	NM_133168	0	0	na	na	6.7	10	1.49	0.56	na	na
OSGIN1	NM_182981	5	0.5	na	na	15.3	17	1.11	0.05	na	na
OSMR	NM_001168355	2	0.5	na	na	6.7	8	1.19	0.1	na	na
OSR1	NM_145260	3	1	na	na	8.6	8	0.93	-0.44	na	na
OSTCP2	XM_929503	0	0	na	na	1.9	2	1.04	-0.07	na	na
OTOG	XM_001717531	8	0.5	na	na	25.9	19	0.73	-1.44	na	na
OTOGL	NM_173591	1	0.5	na	na	3.8	3	0.78	-0.56	na	na
OTP	NM_032109	2	0.5	na	na	8.6	4	0.46	-1.46	na	na
OVGP1	NM_002557	4	0.5	na	na	55.6	79	1.42	1.1	na	na
OVOL1	NM_004561	0	0	na	na	2.9	2	0.7	-0.61	na	na
OVOL2	NM_021220	1	0	na	na	5.7	7	1.22	0.19	na	na
OVOS2	XM_002343151	0	0	na	na	5.7	7	1.22	0.19	na	na
OXCT2	NM_022120	0	0	na	na	24.9	37	1.49	0.99	na	na
OXER1	NM_148962	0	0	na	na	6.7	6	0.89	-0.5	na	na
OXGR1	NM_080818	4	0.5	na	na	31.6	45	1.42	0.82	na	na
OXTR	NM_000916	2	0	na	na	62.3	57	0.92	-1.11	na	na
P2RX1	NM_002558	2	0	na	na	7.7	5	0.65	-0.88	na	na
P2RX2	NM_174872	1	0	na	na	21.1	18	0.85	-0.92	na	na
P4HA3	NM_182904	2	0	na	na	3.8	9	2.35	1.31	na	na
PABPC3	NM_030979	1	0	na	na	4.8	6	1.25	0.24	na	na
PACRG	NM_152410	5	0.5	na	na	16.3	14	0.86	-0.71	na	na
PADI3	NM_016233	0	0	na	na	2.9	2	0.7	-0.61	na	na
PAK3	NM_001128173	4	0	na	na	9.6	16	1.67	0.97	na	na
PAK6	NM_001128629	4	0.5	na	na	14.4	9	0.63	-1.38	na	na
PAK7	NM_177990	2	0	na	na	13.4	14	1.04	-0.13	na	na
PALM2	NM_001037293	5	0.5	na	na	75.7	80	1.06	-0.45	na	na
PALMD	NM_017734	2	0.5	na	na	7.7	13	1.7	0.83	na	na
PAMR1	NM_001001991	2	0.5	na	na	4.8	9	1.88	0.93	na	na
PARD6A	NM_001037281	8	0.5	na	na	53.6	56	1.04	-0.45	na	na
PARK2	NM_004562	7	0.5	na	na	20.1	35	1.74	1.56	na	na
PARP10	NM_032789	2	0.5	na	na	5.7	9	1.57	0.66	na	na
PAX1	NM_006192	3	0.5	na	na	7.7	19	2.48	1.61	na	na
PAX7	NM_002584	3	0	na	na	7.7	2	0.26	-1.9	na	na
PBX4	NM_025245	9	1	na	na	80.5	98	1.22	0.32	na	na
PCBP3	NM_001130141	18	1	na	na	42.1	70	1.66	1.67	na	na
PCDH15	NM_001142769	0	0	na	na	3.8	2	0.52	-0.99	na	na
PCDHA9	NM_014005	0	0	na	na	4.8	12	2.51	1.42	na	na
PCDHB15	NM_018935	0	0	na	na	4.8	6	1.25	0.24	na	na
PCDHB2	NM_018936	1	0	na	na	2.9	6	2.09	1.1	na	na
PCDHGA1	NM_031993	0	0	na	na	1.9	4	2.09	0.84	na	na
PCDHGA12	NM_032094	0	0	na	na	1.9	3	1.57	0.46	na	na
PCDHGA9	NM_032089	0	0	na	na	1.9	5	2.61	1.13	na	na
PCDP1	NM_001271049	0	1	na	na	22	20	0.91	-0.7	na	na
PCED1B	NM_138371	0	0	na	na	3.8	3	0.78	-0.56	na	na
PCK1	NM_002591	7	0	na	na	6.7	6	0.89	-0.5	na	na
PCP2	NM_001271830	0	0	na	na	3.8	5	1.3	0.3	na	na
PCSK2	NM_001201529	1	0.5	na	na	1.9	3	1.57	0.46	na	na
PCSK4	NM_017573	7	1	na	na	42.1	36	0.85	-1.19	na	na
PCSK9	NM_174936	0	1	na	na	3.8	8	2.09	1.11	na	na
PDCL2	NM_152401	0	0	na	na	2.9	3	1.04	-0.08	na	na
PDE2A	NM_001143839	0	0	na	na	16.3	22	1.35	0.65	na	na
PDE4B	NM_001037339	6	1	na	na	26.8	22	0.82	-1.06	na	na
PDE6A	NM_000440	0	0	na	na	26.8	25	0.93	-0.78	na	na
PDE7B	NM_018945	1	0.5	na	na	16.3	11	0.68	-1.2	na	na
PDE8B	NM_001029853	0	0	na	na	12.5	12	0.96	-0.37	na	na
PDGFRA	NM_006206	8	0.5	na	na	25.9	21	0.81	-1.09	na	na
PDGFRB	NM_002609	2	0.5	na	na	1.9	3	1.57	0.46	na	na
PDIA2	NM_006849	0	0	na	na	38.3	42	1.1	-0.11	na	na
PEAR1	NM_001080471	0	0	na	na	5.7	4	0.7	-0.77	na	na
PEG10	NM_001172437	5	1	na	na	23	31	1.35	0.67	na	na
PF4	NM_002619	0	0	na	na	2.9	5	1.74	0.79	na	na
PFKFB1	NM_001271805	2	0	na	na	10.5	5	0.47	-1.42	na	na
PFN4	NM_199346	1	0	na	na	9.6	10	1.04	-0.15	na	na
PGAM4	NM_001029891	0	0.5	na	na	7.7	7	0.91	-0.46	na	na
PGK2	NM_138733	0	0	na	na	1.9	3	1.57	0.46	na	na
PGR	NM_001271161	0	0.5	na	na	7.7	6	0.78	-0.78	na	na
PHACTR3	NM_183246	1	1	na	na	42.1	50	1.19	0.23	na	na
PHEX	NM_000444	0	0	na	na	1.9	3	1.57	0.46	na	na
PHF7	NM_173341	11	1	na	na	220.3	226	1.03	-1.06	na	na
PHLDA1	NM_007350	7	1	na	na	58.4	79	1.35	0.94	na	na
PHOSPHO1	NM_178500	10	1	na	na	54.6	63	1.15	0.05	na	na
PHOX2A	NM_005169	2	0	na	na	2.9	35	12.18	4.1	na	na
PI15	NM_015886	1	0.5	na	na	88.1	120	1.36	1.01	na	na
PIEZO2	NM_022068	2	1	na	na	10.5	15	1.42	0.59	na	na
PIFO	NM_181643	2	0.5	na	na	7.7	12	1.57	0.66	na	na
PIH1D3	NM_173494	0	0	na	na	4.8	2	0.42	-1.28	na	na
PIK3R5	NM_014308	5	0	na	na	14.4	21	1.46	0.89	na	na
PIK3R6	NM_001010855	0	0	na	na	2.9	5	1.74	0.79	na	na
PILRA	NM_178273	0	0	na	na	5.7	8	1.39	0.42	na	na
PILRB	NM_178238	0	0	na	na	331.4	328	0.99	-1.55	na	na
PINLYP	NM_001193622	0	0	na	na	3.8	6	1.57	0.61	na	na
PION	NM_017439	0	0.5	na	na	5.7	3	0.52	-1.25	na	na
PIP5KL1	NM_173492	1	0.5	na	na	12.5	10	0.8	-0.78	na	na
PIPOX	NM_016518	0	0	na	na	10.5	8	0.76	-0.84	na	na
PITPNM2	NM_020845	17	1	na	na	206.9	208	1.01	-1.12	na	na
PITPNM3	NM_001165966	5	0.5	na	na	163.8	169	1.03	-0.71	na	na
PIWIL4	NM_152431	0	0	na	na	14.4	9	0.63	-1.38	na	na
PKD1L1	NM_138295	0	0	na	na	7.7	10	1.3	0.28	na	na
PKD2L2	NM_014386	0	0	na	na	1.9	2	1.04	-0.07	na	na
PKDCC	NM_138370	27	1	na	na	590.1	690	1.17	0	na	na
PKDREJ	NM_006071	0	0	na	na	1.9	3	1.57	0.46	na	na
PKIG	NM_007066	5	0.5	na	na	300.8	306	1.02	-1.22	na	na
PLA2G4C	NM_003706	4	0.5	na	na	12.5	24	1.93	1.72	na	na
PLAC8L1	NM_001029869	0	0	na	na	10.5	12	1.14	0.06	na	na
PLCB2	NM_004573	2	0.5	na	na	34.5	45	1.3	0.64	na	na
PLCH2	NM_014638	0	0	na	na	1.9	3	1.57	0.46	na	na
PLEK	NM_002664	0	0	na	na	6.7	5	0.75	-0.65	na	na
PLEKHA8	NM_001197027	5	1	na	na	74.7	85	1.14	-0.04	na	na
PLEKHD1	NM_001161498	0	0	na	na	1.9	3	1.57	0.46	na	na
PLIN1	NM_001145311	1	0	na	na	30.7	40	1.3	0.5	na	na
PLIN4	NM_001080400	0	0	na	na	10.5	6	0.57	-1.44	na	na
PLIN5	NM_001013706	3	0.5	na	na	22	28	1.27	0.47	na	na
PLK3	NM_004073	18	0.5	na	na	60.3	69	1.14	-0.01	na	na
PLK5	NM_001243079	0	0	na	na	14.4	18	1.25	0.42	na	na
PLN	NM_002667	0	0	na	na	10.5	15	1.42	0.59	na	na
PLXDC1	NM_020405	0	0	na	na	26.8	22	0.82	-1.06	na	na
PLXNA4	NM_001105543	0	0	na	na	3.8	7	1.83	0.87	na	na
PLXNB3	NM_005393	2	0	na	na	1.9	3	1.57	0.46	na	na
PLXNC1	NM_005761	3	1	na	na	30.7	20	0.65	-1.85	na	na
PMFBP1	NM_001160213	0	0	na	na	41.2	36	0.87	-1.09	na	na
PNCK	NM_001039582	7	0.5	na	na	32.6	20	0.61	-2.06	na	na
PNPLA7	NM_001098537	6	1	na	na	29.7	29	0.98	-0.6	na	na
PODNL1	NM_001146255	0	0	na	na	6.7	7	1.04	-0.18	na	na
POF1B	NM_024921	0	0	na	na	2.9	4	1.39	0.41	na	na
POM121L2	NM_033482	3	1	na	na	6.7	6	0.89	-0.5	na	na
POMZP3	NM_012230	0	0	na	na	213.6	244	1.14	-0.07	na	na
POPDC2	NM_022135	0	0	na	na	10.5	5	0.47	-1.42	na	na
POSTN	NM_001135936	0	0	na	na	2.9	3	1.04	-0.08	na	na
POTEJ	XM_003960309	0	0	na	na	5.7	2	0.35	-1.52	na	na
POU2F2	NM_001207026	3	1	na	na	8.6	7	0.81	-0.7	na	na
POU2F3	NM_001244682	0	0	na	na	4.8	4	0.84	-0.46	na	na
POU6F1	NM_002702	0	1	na	na	107.3	139	1.3	0.77	na	na
POU6F2	NM_007252	3	0.5	na	na	3.8	4	1.04	-0.08	na	na
PPAP2C	NM_177526	1	0	na	na	4.8	2	0.42	-1.28	na	na
PPAPDC1A	NM_001030059	2	0.5	na	na	20.1	24	1.19	0.25	na	na
PPAPDC3	NM_032728	3	0	na	na	14.4	26	1.81	1.53	na	na
PPEF1	NM_152226	1	0	na	na	3.8	3	0.78	-0.56	na	na
PPEF2	NM_006239	0	0	na	na	5.7	7	1.22	0.19	na	na
PPFIA4	NM_015053	1	0	na	na	144.6	140	0.97	-1.31	na	na
PPIL6	NM_173672	10	1	na	na	69	65	0.94	-1.1	na	na
PPM1M	NM_001122870	16	0.5	na	na	179.1	201	1.12	-0.22	na	na
PPM1N	NM_001080401	12	1	na	na	144.6	166	1.15	-0.13	na	na
PPP1R14D	NM_017726	0	0	na	na	3.8	2	0.52	-0.99	na	na
PPP1R16B	NM_001172735	11	0	na	na	106.3	140	1.32	0.87	na	na
PPP1R18	XM_003403597	5	0.5	na	na	86.2	101	1.17	0.08	na	na
PPP1R1A	NM_006741	9	0	na	na	94.8	108	1.14	-0.09	na	na
PPP1R1B	NM_001242464	0	0	na	na	2.9	2	0.7	-0.61	na	na
PPP1R1C	NM_001080545	0	0	na	na	1.9	3	1.57	0.46	na	na
PPP1R32	NM_145017	9	0.5	na	na	23.9	16	0.67	-1.47	na	na
PPP1R36	NM_172365	0	0	na	na	2.9	3	1.04	-0.08	na	na
PPP1R42	NM_001013626	1	0	na	na	7.7	6	0.78	-0.78	na	na
PPP2R2B	NM_181677	0	0	na	na	1.9	6	3.13	1.37	na	na
PPP2R2C	NM_181876	8	0.5	na	na	110.2	116	1.05	-0.59	na	na
PPP5D1	NM_001205281	1	1	na	na	12.5	14	1.12	0.1	na	na
PRAC	NM_032391	0	0	na	na	1.9	3	1.57	0.46	na	na
PRDM1	NM_001198	1	0	na	na	8.6	7	0.81	-0.7	na	na
PRDM12	NM_021619	1	0.5	na	na	27.8	23	0.83	-1.02	na	na
PRDM14	NM_024504	0	0	na	na	9.6	3	0.31	-2.12	na	na
PRDM7	NM_052996	0	0	na	na	61.3	70	1.14	-0.02	na	na
PRDM8	NM_001099403	13	1	na	na	46.9	40	0.85	-1.2	na	na
PRICKLE4	NM_013397	2	0	na	na	105.4	102	0.97	-1.14	na	na
PRIMA1	NM_178013	5	1	na	na	59.4	65	1.09	-0.26	na	na
PRKCB	NM_212535	11	1	na	na	16.3	31	1.9	1.68	na	na
PRKCG	NM_002739	1	1	na	na	46.9	36	0.77	-1.65	na	na
PRKG2	NM_006259	7	1	na	na	30.7	31	1.01	-0.47	na	na
PROB1	NM_001161546	0	0.5	na	na	45	47	1.04	-0.45	na	na
PROCA1	NM_152465	1	0	na	na	20.1	41	2.04	2.11	na	na
PROK2	NM_001126128	1	2.5	na	na	91	132	1.45	1.4	na	na
PROM2	NM_001165977	0	0	na	na	3.8	7	1.83	0.87	na	na
PRPH	NM_006262	10	0.5	na	na	28.7	68	2.37	2.75	na	na
PRR16	NM_016644	1	0	na	na	30.7	34	1.11	-0.12	na	na
PRR22	NM_001134316	7	0.5	na	na	153.3	152	0.99	-0.99	na	na
PRR24	NM_178511	8	1	na	na	73.8	81	1.1	-0.24	na	na
PRRG2	NM_000951	0	1	na	na	14.4	22	1.53	1.03	na	na
PRSS27	NM_031948	0	0	na	na	108.2	106	0.98	-1.07	na	na
PRSS36	NM_001258291	1	1.5	na	na	3.8	4	1.04	-0.08	na	na
PRSS50	NM_013270	0	0	na	na	2.9	3	1.04	-0.08	na	na
PRSS53	NM_001039503	0	0.5	na	na	31.6	31	0.98	-0.58	na	na
PSD	NM_001270965	1	0	na	na	38.3	38	0.99	-0.54	na	na
PSD2	NM_032289	1	0	na	na	3.8	9	2.35	1.31	na	na
PSD4	NM_012455	3	0.5	na	na	27.8	37	1.33	0.57	na	na
PSMB9	NM_002800	1	0	na	na	6.7	5	0.75	-0.65	na	na
PSMD5	NM_005047	1	0	na	na	7.7	14	1.83	0.98	na	na
PTAFR	NM_001164722	1	0	na	na	39.3	39	0.99	-0.54	na	na
PTCH2	NM_001166292	3	0	na	na	36.4	44	1.21	0.31	na	na
PTCHD1	NM_173495	2	0	na	na	4.8	5	1.04	-0.07	na	na
PTF1A	NM_178161	0	0	na	na	1.9	6	3.13	1.37	na	na
PTGDR2	NM_004778	0	0	na	na	7.7	2	0.26	-1.9	na	na
PTGDS	NM_000954	0	0	na	na	1.9	4	2.09	0.84	na	na
PTGER2	NM_000956	5	1	na	na	83.3	80	0.96	-1.15	na	na
PTGER4	NM_000958	0	0	na	na	11.5	6	0.52	-1.62	na	na
PTGES3L	NM_001142654	1	0	na	na	35.4	21	0.59	-2.19	na	na
PTGFR	NM_000959	1	0	na	na	17.2	6	0.35	-2.46	na	na
PTGIS	NM_000961	1	0.5	na	na	21.1	23	1.09	-0.06	na	na
PTH1R	NM_001184744	2	1	na	na	9.6	20	2.09	1.51	na	na
PTH2	NM_178449	1	1	na	na	4.8	4	0.84	-0.46	na	na
PTHLH	NM_198966	1	0.5	na	na	9.6	7	0.73	-0.92	na	na
PTP4A3	NM_007079	6	1	na	na	117.8	125	1.06	-0.54	na	na
PTPN22	NM_012411	0	0	na	na	1.9	4	2.09	0.84	na	na
PTPN5	NM_001039970	2	0	na	na	9.6	7	0.73	-0.92	na	na
PTPRB	NM_002837	4	0.5	na	na	26.8	28	1.04	-0.35	na	na
PTPRCAP	NM_005608	0	0	na	na	2.9	5	1.74	0.79	na	na
PTPRE	NM_130435	0	0	na	na	7.7	10	1.3	0.28	na	na
PTPRN2	NM_130843	0	0	na	na	3.8	4	1.04	-0.08	na	na
PTPRO	NM_002848	8	1	na	na	15.3	27	1.76	1.45	na	na
PURG	NM_013357	6	0.5	na	na	65.1	83	1.27	0.6	na	na
PVALB	NM_002854	4	0.5	na	na	9.6	14	1.46	0.65	na	na
PVRIG	NM_024070	0	0	na	na	4.8	2	0.42	-1.28	na	na
PXMP4	NM_183397	13	1	na	na	146.6	192	1.31	0.8	na	na
PYGM	NM_001164716	0	0	na	na	11.5	8	0.7	-1.02	na	na
PYROXD2	NM_032709	0	0	na	na	5.7	3	0.52	-1.25	na	na
RAB25	NM_020387	1	0	na	na	2.9	3	1.04	-0.08	na	na
RAB26	NM_014353	10	0.5	na	na	70.9	76	1.07	-0.37	na	na
RAB33A	NM_004794	1	0	na	na	6.7	2	0.3	-1.72	na	na
RAB37	NM_001163990	1	0	na	na	8.6	11	1.28	0.33	na	na
RAB43	NM_001204885	10	0.5	na	na	23	18	0.78	-1.22	na	na
RABL2A	NM_007082	2	0	na	na	5.7	12	2.09	1.26	na	na
RABL2B	NM_001130919	6	1	na	na	34.5	25	0.72	-1.73	na	na
RAD9B	NM_152442	1	1.5	na	na	16.3	12	0.74	-1.18	na	na
RAET1G	NM_001001788	7	0	na	na	11.5	6	0.52	-1.62	na	na
RAG1	NM_000448	0	0.5	na	na	7.7	19	2.48	1.61	na	na
RANBP3L	NM_145000	0	0	na	na	1.9	2	1.04	-0.07	na	na
RAPGEF3	NM_001098531	5	0	na	na	10.5	7	0.66	-1.12	na	na
RAPGEFL1	NM_016339	4	0.5	na	na	150.4	140	0.93	-1.59	na	na
RASA4	NM_001079877	1	0	na	na	119.7	105	0.88	-1.79	na	na
RASD1	NM_001199989	1	0	na	na	4.8	9	1.88	0.93	na	na
RASD2	NM_014310	5	1	na	na	47.9	39	0.81	-1.39	na	na
RASGRF1	NM_153815	0	0	na	na	5.7	5	0.87	-0.39	na	na
RASGRP3	NM_015376	4	0.5	na	na	8.6	8	0.93	-0.44	na	na
RASL10A	NM_006477	2	0	na	na	26.8	26	0.97	-0.63	na	na
RASSF4	NM_032023	6	0.5	na	na	75.7	81	1.07	-0.38	na	na
RASSF6	NM_201431	3	0.5	na	na	37.4	36	0.96	-0.67	na	na
RBM24	NM_001143942	0	2	na	na	18.2	20	1.1	-0.04	na	na
RBM43	NM_198557	16	1	na	na	73.8	117	1.59	1.84	na	na
RBM44	NM_001080504	0	0	na	na	33.5	51	1.52	1.3	na	na
RBP5	NM_031491	1	0	na	na	5.7	5	0.87	-0.39	na	na
RBP7	NM_052960	13	1	na	na	60.3	66	1.09	-0.26	na	na
RCAN2	NM_005822	9	1	na	na	36.4	46	1.26	0.5	na	na
RDH12	NM_152443	3	1	na	na	4.8	21	4.38	2.38	na	na
RDH16	NM_003708	0	0	na	na	8.6	9	1.04	-0.15	na	na
RDH5	NM_002905	0	0	na	na	6.7	12	1.79	0.94	na	na
REC8	NM_005132	0	0	na	na	22	15	0.68	-1.42	na	na
REP15	NM_001029874	0	0	na	na	5.7	5	0.87	-0.39	na	na
RFPL2	NM_001098527	0	0	na	na	10.5	13	1.23	0.25	na	na
RFTN2	NM_144629	1	1	na	na	16.3	26	1.6	1.15	na	na
RGAG1	NM_020769	1	0	na	na	7.7	5	0.65	-0.88	na	na
RGR	NM_001012722	0	0	na	na	7.7	3	0.39	-1.74	na	na
RGS22	NM_015668	0	0	na	na	1.9	2	1.04	-0.07	na	na
RGS4	NM_001113381	7	0.5	na	na	47.9	46	0.96	-0.87	na	na
RGS9	NM_001165933	6	1	na	na	6.7	13	1.94	1.1	na	na
RGS9BP	NM_207391	2	0	na	na	33.5	36	1.07	-0.2	na	na
RHBDL1	NM_003961	0	0	na	na	17.2	22	1.28	0.48	na	na
RHOJ	NM_020663	0	0	na	na	4.8	10	2.09	1.11	na	na
RHOXF1	NM_139282	0	0	na	na	4.8	3	0.63	-0.94	na	na
RHOXF2B	XM_003960835	1	0.5	na	na	2.9	2	0.7	-0.61	na	na
RIBC1	NM_001267053	2	1	na	na	20.1	18	0.89	-0.75	na	na
RIC3	NM_024557	0	0	na	na	3.8	3	0.78	-0.56	na	na
RIIAD1	NM_001144956	0	0.5	na	na	3.8	2	0.52	-0.99	na	na
RIMS1	NM_014989	3	0	na	na	21.1	26	1.23	0.36	na	na
RIN1	NM_004292	1	0	na	na	3.8	3	0.78	-0.56	na	na
RINL	NM_198445	1	0	na	na	11.5	12	1.04	-0.15	na	na
RIPPLY2	NM_001009994	9	1	na	na	51.7	60	1.16	0.08	na	na
RLN1	NM_006911	1	1.5	na	na	11.5	8	0.7	-1.02	na	na
RLN2	NM_005059	0	0	na	na	64.2	50	0.78	-1.92	na	na
RNF112	NM_007148	0	0	na	na	1.9	3	1.57	0.46	na	na
RNF165	NM_001256758	1	0	na	na	55.6	79	1.42	1.1	na	na
RNF175	NM_173662	1	1	na	na	16.3	9	0.55	-1.68	na	na
RNF180	NM_001113561	1	0	na	na	5.7	10	1.74	0.88	na	na
RNF207	NM_207396	4	1	na	na	87.2	94	1.08	-0.43	na	na
RNF208	NM_031297	12	0	na	na	126.4	137	1.08	-0.53	na	na
RNF212	NM_001131034	0	0	na	na	7.7	6	0.78	-0.78	na	na
RNF217	NM_152553	16	1	na	na	94.8	149	1.57	1.89	na	na
RNF32	NM_001184997	2	0	na	na	14.4	34	2.37	2.34	na	na
ROM1	NM_000327	3	0	na	na	22	22	1	-0.37	na	na
ROPN1L	NM_001201466	1	0.5	na	na	12.5	6	0.48	-1.78	na	na
RORA	NM_134261	8	0.5	na	na	373.6	486	1.3	1.03	na	na
RORB	NM_006914	11	0.5	na	na	39.3	41	1.04	-0.32	na	na
ROS1	NM_002944	0	1	na	na	1.9	5	2.61	1.13	na	na
RP1L1	NM_178857	0	0	na	na	9.6	9	0.94	-0.41	na	na
RPA4	NM_013347	0	0	na	na	8.6	4	0.46	-1.46	na	na
RPGRIP1	NM_020366	1	0	na	na	1.9	5	2.61	1.13	na	na
RPH3AL	NM_001190411	7	1	na	na	39.3	65	1.66	1.66	na	na
RPL10L	NM_080746	0	0	na	na	5.7	11	1.91	1.08	na	na
RPL3L	NM_005061	0	0	na	na	6.7	8	1.19	0.1	na	na
RPS4Y2	NM_001039567	0	0	na	na	1.9	2	1.04	-0.07	na	na
RRH	NM_006583	5	1	na	na	15.3	18	1.17	0.23	na	na
RSC1A1	NM_006511	0	1.5	na	na	230.8	255	1.1	-0.38	na	na
RSPH1	NM_080860	0	0	na	na	12.5	15	1.2	0.3	na	na
RSPH4A	NM_001161664	5	0.5	na	na	45	43	0.96	-0.71	na	na
RSPO4	NM_001040007	0	0	na	na	4.8	4	0.84	-0.46	na	na
RTBDN	NM_001270445	1	1	na	na	6.7	2	0.3	-1.72	na	na
RTDR1	NM_014433	3	0.5	na	na	11.5	10	0.87	-0.59	na	na
RTEL1	NM_016434	0	0	na	na	56.5	72	1.27	0.55	na	na
RUNDC3A	NM_001144825	4	0	na	na	23.9	20	0.84	-0.99	na	na
RUNX2	NM_001015051	8	1	na	na	73.8	61	0.83	-1.84	na	na
RUSC1-AS1	NM_001039517	0	0.5	na	na	22	28	1.27	0.47	na	na
S100A1	NM_006271	1	0	na	na	6.7	5	0.75	-0.65	na	na
S100A2	NM_005978	0	0	na	na	3.8	3	0.78	-0.56	na	na
S100A4	NM_002961	6	0.5	na	na	24.9	28	1.12	-0.07	na	na
S100A6	NM_014624	2	0	na	na	1.9	16	8.35	2.66	na	na
SAGE1	NM_018666	0	0	na	na	1.9	4	2.09	0.84	na	na
SALL4	NM_020436	0	0	na	na	22	26	1.18	0.21	na	na
SAMD12	NM_207506	3	0	na	na	7.7	12	1.57	0.66	na	na
SAMD13	NM_001134664	2	0	na	na	61.3	38	0.62	-2.57	na	na
SAMD14	NM_001257359	2	0	na	na	45	32	0.71	-1.8	na	na
[truncated: 11,928 more rows]
